# Supplementary material for: Sequencing of Transcriptome and Small RNA Revealed the Xenobiotic Metabolism-Related Genes and Potential Regulatory miRNA in Asian Tramp Snail
Source: Front Genet. 2021 Jan 13;11:595166. doi: 10.3389/fgene.2020.595166 (PMC7838618; doi:10.3389/fgene.2020.595166)
Supplement: Supplementary file 3 [file Table_4.xlsx]

## Sheet: D. melanogaster
Supplementary Table 4. Drosophila melanogaster CCE sequences used to construct a phylogenetic tree.
gene ID in phelogenetic tree	AA sequence	length (aa)	clade
CG31146	MKFRLAAFWLFLLTVGGNHKLLSHVSPMGVAAEKQPLHKGNELENAMKLREAPKQSRVIGDITTTIQPDSDPGRSIGHQALRRAKAPPPSLELHFRQNLNKLFAGDETTHVGHTNATDNTTAAVLATDEGSSEHEPSTTHHPERRHVVPDKLQYTQEIQVKQGRLMGITRRFQVTSGLRQVDQFLGLPYAEAPTGNRRFMPPGAPLPWQGLKIARHLPPVCPQKLPDLSPHGSENMSRARHKHLSRLLPYLRTESEDCLYLNLYVPHEEPQSTPKQYAVLVYLHGESFEWNSGNPYDGSVLSSYGEVIVVTVNYRLGVLGFLRPSIDAHNIANYALLDQIAALHWIKENIEAFGGDNSRVTLMGHSTGAACVNYLMVSPVASGLFHRAILMSGSAMSDW…	1354	M
CG13772	MAQTKIIQSRFLHIYGLLCLGSLMGCIKTIGASIAQQTLADADAPDEAKAKEREAETDADADAEGDAKAETETGKGTREHTNGDAEADARIMATGICIIRLITLKRFLENSKTEEHNQRRQQSATSAASAAPAGATSPRRRHLHYPGHSAVQPGHPEACALLVLLLLTSLWPDCCECLHGGSNTVKTKYGLLRGIVVRSSPLVEAFLGIPYASPPVGSLRFMPPITPSTWKTVRSADRFSPVCPQNIPIPPNGPEALLEVPRARLAQLRRLLPLLKNQSEDCLYLNIYVPYETRRQRRNTDDTTGEPKTKLSTVVFIHGESYDWNSGNPYDGSELAAHGNVIVVTINFRLGIFGFLKTGGKESAQGNFGLMDLVAGLHWLKENLPAFGGDPQSITLLGY…	1248	M
CG34127	MVMLLSKRQLPPSAATRTRRKVPPTRRRSTWALSSLLALVVLDICIARCLAAGISYSSNSGNLSTSQKSPSSANNGGLVLIGSSSATSSSVPSLSLTSSSSAGLSSPGSSSSSSSSSTSTSGSNSNRSSRPTSNNSNSNSNYSPNHDQLPAQLSSRIINTRNGAISGVIVQLDGRHLDPVEAYRGIPYASPPVGNLRFMPPVSAAMWSGVKKADRFSPVCPQRLPDIHNETAALERMPKGRLEYLKRLLPYLQNQSEDCLYLNIYVPIQVGSRDSSGSSSSSSAGSSSSGSGGSSSSSSSSSTSSSSAGSGSPAKYPVLVFVHGESYEWNSGNPYDGSVLASYGQILVVTINYRLGVLGFLNANTDRYSKLPANYGLMDIIAALHWLKENIAAFGGDPN…	1159	M
CG34139	MGESQLLLLLRLLLLPTVLISWMHCAGASTADIYKGARLGHRIVQTRYGRLHGLILPLDSFRFLRSVEVFLGVPYATPPTKQNRFSPTRAPAPWDGIRISDKYSPVCPQRLPNIQNETAALEKMPKGRLEYLKRLLPFLENQSEDCLYLNVFSPVNAGANEKKLPVIVFIHGESFEWSSGNPYDGSVLASYGEVVVVTLNYRLGILGFLNANPNPHAHARVANYGLMDQMAALHWIQQNIQKFGGDPNSVTLAGHGTGAACINYLMTSPTMVRGLFHRAILMSGSAYSSWALVEDPVLFAIKLAKEVNCTIPDDINRHHEQIVDCLRDVPLEDLYLADIQAPNFLTSFGPSVDGVVIRPGHSNLDIDDLMARNSRRSSADSGFQSSAGGGGGQGGGAGG…	1280	M
CG3903	MMHKLKYRDKLKWLLALLVLIGTCFIQTRGQTRDPRFYSRPGVDYHWPNPGDPDYRTYTFNDRRYGHYQPNGYGANYPGRNPPGQYPQGMPNEDRFRFDPNDPNARTQFPGVLAGWREDLQGKQRRDSLTLERDVFVTTNYGQVQGFKVYMYDNPDPKSFYRPYHSTVDRVMGECSVFLGIPYALPPTFEGRFKPPRVHRGWQLLQAVDFGPACPQPVRYTGATKGIMDMDEDCLYLNVYSPKTGAGVAQKYPVMVYIHGGEFIRGASNLFQGHILASFYDVVVVTLNYRLGALGFLSTGDENSPGNYGILDQAMALRWVYDNIEFFNGDRNSITLFGPGAGGASAGLLMVAPQTRNIVRRVIAQSGSALADWALIQDKYRAQNTSRVLGQLLGCSIES…	956	L
CG17907	MAISCRQSRVLPMSLPLPLTIPLPLVLVLSLHLSGVCGVIDRLVVQTSSGPVRGRSVTVQGREVHVYTGIPYAKPPVEDLRFRKPVPAEPWHGVLDATRLSATCVQERYEYFPGFSGEEIWNPNTNVSEDCLYINVWAPAKARLRHGRGANGGEHPNGKQADTDHLIHNGNPQNTTNGLPILIWIYGGGFMTGSATLDIYNADIMAAVGNVIVASFQYRVGAFGFLHLAPEMPSEFAEEAPGNVGLWDQALAIRWLKDNAHAFGGNPEWMTLFGESAGSSSVNAQLMSPVTRGLVKRGMMQSGTMNAPWSHMTSEKAVEIGKALINDCNCNASMLKTNPAHVMSCMRSVDAKTISVQQWNSYSGILSFPSAPTIDGAFLPADPMTLMKTADLKDYDILM…	649	J
CG6917	MNYVGLGLIIVLSCLWLGSNASDTDDPLLVQLPQGKLRGRDNGSYYSYESIPYAEPPTGDLRFEAPEPYKQKWSDIFDATKTPVACLQWDQFTPGANKLVGEEDCLTVSVYKPKNSKRNSFPVVAHIHGGAFMFGAAWQNGHENVMREGKFILVKISYRLGPLGFVSTGDRDLPGNYGLKDQRLALKWIKQNIASFGGEPQNVLLVGHSAGGASVHLQMLREDFGQLARAAFSFSGNALDPWVIQKGARGRAFELGRNVGCESAEDSTSLKKCLKSKPASELVTAVRKFLIFSYVPFAPFSPVLEPSDAPDAIITQDPRDVIKSGKFGQVPWAVSYVTEDGGYNAALLLKERKSGIVIDDLNERWLELAPYLLFYRDTKTKKDMDDYSRKIKQEYIGNQ…	544	G
CG17148	MSIFKRLLCLTLLWIAALESEADPLIVEITNGKIRGKDNGLYYSYESIPNAEHPTGALRFEAPQPYSHHWTDVFNATQSPVECMQWNQFINENNKLMGDEDCLTVSIYKPKKPNRSSFPVVVLLHGGAFMFGSGSIYGHDSIMREGTLLVVKISFGLGPLGFASTGDRHLPGNYGLKDQRLALQWIKKNIAHFGGMPDNIVLIGHSAGGASAHLQLLHEDFKHLAKGAISVSGNALDPWVIQQGGRRRAFELGRIVGCGHTNVSAELKDCLKSKPASDIVSAVRSFLVFSYVPFSAFGPVVEPSDAPDAFLTEDPRAVIKSGKFAQVPWAVTYTTEDGGYNAAQLLERNKLTGESWIDLLNDRWFDWAPYLLFYRDAKKTIKDMDDLSFDLRQQYLADR…	544	G
CG6414	MSKDAGLWSIRVILLCICIQWSDGRNSQCLHVRLSHGGWLIGRHLTTHNGRHMRAFMGVPYAEPPLDDLRFRPPVPKAPWEGERLAIKDAPICLQRDPFRRDMILEGSEDCLYLNVYTPERPRTNGSLPVMVWFHGGGWQCGSGISSFYGPDFLLDHDIVLVSANFRLGPLGFLSTETLDCPGNNGLKDQLEVLHWVRANIASFGGDPNSVTVFGESAGGASVTYHMLSEKSRGLLHRGIAQSGTYFNPWAQPAHKGVAAGRATKLAQIVGCGNAGEWPEKLECLRKKPAEDIVASLYDMFVWDFDPMIPFPPVVEPEHDGAFLTVAPRQAAKPHGLQLPLMVGATAEEGLLKTAALLNLPQLLAEFKSQFEQVLPVVLNYDHHDDSVRQTITQRIESF…	583	G
CG8425	MIQQRMLQLLLLGQLLAGPGPFCAALATVDQLTVCPPSVGCLKGTNLQGYQSERFEAFMGIPYALPPIGDLRFSNPKVMPKLLGMYDASAPKMDCIQKNYLLPTPVVYGDEDCLYLNVYRPEIRKSALPVMVYIHGGGFFGGSAGPGVTGPEYFMDSGEVILVTMAYRLGPFGFLSTQDAVMSGNFGLKDQNLALRWVQRNIRFFGGDPQRVTIFGQSAGGVAAHMHLLSPRSHGLFHRVISMSGTANVPFAIAEQPLEQARLLAEFADVPDARNLSTVKLTKALRRINATKLLNAGDGLKYWDVDHMTNFRPVVEEGLEVDAFLNAHPMDMLAQGMPTSIPLLLGTVPGEGAVRVVNILGNETLRQSFNLRFDELLQELLEFPASFSQDRREKMMDLL…	579	G
CG8424	MLFAGFGVLLFVAVAVGDSLDVCLEDMGCMRGTLMPGYQSGEFEAFMGIPFAQPPVGPLRLKNPVPNEPWEGVLDAGAAKDSCIQRSYFAKEWGLMGVEDCLYLNVYRPKNRAEDKLPVMVYIHGGGFFSGSAHPMASGPEYLMDTNKVVMVTMNYRLGPFGFLSTGDEHMPGNFGFKDQRLALQWIQKHIATFGGDPKKVTVLGHSAGGISAHLHMISPNSKGLFQNSMSLTGTMFLSAMKILKDPLSQARRLGKELAIDQAESLSSQDLAEALRNVCPKKLLVSVDSLKVWDNMPHLTTLPVLEAPSPDAFLVEDPLDAHRAGRINQMPWILSLSSRAGEGSLFIMRAFINPKLRAEFNENFLEHMALLLNLPEGTPVQMVSEILDAYDFKGDSLNN…	559	G
CG10175	MHYSNLFTQTTSKRTMTTTGLRPLLSLLFLGLGVILLCDVSSSIAIAPSTFGTAIARAGKISNQLKETTAWKTLTSHPNSLVQLLPSRAMRVVQEVVRSLRKEREIVATTSLGKVRGRYQKYRSGERGGYYSFKGMRYGAPPTGARRFRAAEPEKPWSGIRDASREGQSCPHKNMILDTFKGDEDCLFVNVFTTQMPKDDESAEQPKLPVMVWLHGGGFSFGSGNSFLYGPDYLVAEDIVLVTLNYRLGPLGFLTAGPDAPGNQGLKDQVLALKWVRDNIAAFGGDPNQVTIFGESAGASSVQLLLLSSQAKGLFHRAISQSGSALNPWSMSASSSQRAARLAANLGYVGANKTEDILDFLRRVPAMKLVEAAPTTITAEDQRNNIGLPFVPVVEGYWN…	659	A
CG2505	MEVQVGWPKLIKMGAQLVGHKVQQYRLSTGHTVILDTKYGQVRGLQRKTVYDKEPYFAFEGIPYAKPPVGDLRFRAPQPPEPWQGVLNCTTNRSKPMQRNMLLGIVEGSEDCLHLNVYVKALKSEKPLPVIVWIYGGGFQKGEASRDIYSPDYFMKKPVVFVAINYRLAALGFLSLKDPKLDVPGNAGLKDQVMALRWISQNIAHFNGDPNNITLMGESAGSASVHVMMTTEQTRGLFHKAIMQSGCALSEWVESPDNNWAFRLAQNLGYKGDEKDADVLSFLSKVCARQIAAIDQDVINLDEVRSFLLFAFGPVIEPYETDHCVVPKRHKDLLSEAWGNDIPVIVGGNSFEGLFSYQLVRKDPWALKNFHNILPREVRETSSLEGQDLLVRRLKQLYF…	566	B
CG1031	MEIRVGVGDLLKMGTKLIGHKIVQYRLGTKQTKVVCTRDGQVRGHRRRTLYDEEMYFAFEGIPFAQPPVGELRFRAPQPPHPWLGVRDCTYPRAKPMQKHFVLSIVEGSEDCLYLNVYSKRLRSDKPLPVIVWIYGGGFQFGEAGRDFYSPDYFMQQDVVVVTFNYRVGALGFLSLADRDLDVPGNAGLKDQVMALRWISQNIAQFNGDPQNITVMGESAGAASVHALMTTEQTRGLFHKAIMQSGSMFCEWANEPSGRWAYRLACQLGYSGSENEKEVFRYLQKAPASEMAAQGITLVSQEERRQYVLFPFTPVVEPYITRDCVLPRCHREMLPEAWGNDLPLILGGNSFEGLFSYQSTLHDEEHMLSAFEVLIPREIREKSTQSHLKDLLRQFKVDN…	565	B
CG6018	MDLRVSFSDKLKLGAKIIGHKVVQYKLGTGQTKELATKYGQLKGQQRRTLYDGEPYYSFEGIPFAQPPVGELRFRAPQPPSSWQGVRDCTYAREKPMQRNSITNAAEGSEDCLYLNVYAKRLESPKPLPVMVWIFGGGFQVGGASRELYGPDYFMKHDILLVTINYRVGVLGFLSLKDKELKIPGNAGLKDQIQALRWVKENIASFNGDPESITVFGESAGGASTHILMQTEQARGLFHRAIVQSGSALCAWATQPDRKWPQRLGKELGYAGNLESEKELLEFFQQIPASKLAQYCNSIVTQEEQRDYEILAFAPVIEPYVGDDCVIPKSQQEQLSSAWGNSIPMIIGGTSFEGLFSYRTTLDDPLYMLSAFEAIIPKQVRDAIDKEELAEMVRRLKKS…	566	B
CG1089	MMSKESSLETCELTLPVGQIKGVKRLSLYDDPYFSFEKIPFAKPPLGELRFRAPVPADPWSGVLDCTHYAEKPTQRGLLTREIEGGEDCLYLNVYSKQLKSEKPLPVMVYIYGGAFTVGEATRELYGPDYFMTKDVVLVTLNYRVDCLGFLSLKDPSLKVPGNAGLKDQVLALKWVKQYISNFNGDDSNITVFGESAGGCSTHFMMCTEQTRGLFHKAIPMSGTVHNYWANNPAEDFAFRLAQQNGFTGENDDAKVLEYLQGVPARDLVNHNLLTPEHRRNGLLFAFGPTVEAYVGEDCVVPKPPVEMARDAWSNNFPVMLGGTSFEGLFMYPAVSANLKALDSLSQDPTRLVPVDVRTVSSEKENLEYSQRLMKAYFGYSPPSSELLLNMLDFYSYKI…	543	B
CG1112	MNKNLGFVERLRWRLKTIEHKVQQYRQSTNETVVADTEYGQVRGIKRLSLYDVPYFSFEGIPYAQPPVGELRFKAPQRPIPWERVRDCSQPKDKAVQVQFVFDKVEGSEDCLYLNVYTNNVKPDKARPVMVWIHGGGFIIGEANREWYGPDYFMKEDVVLVTIQYRLGALGFMSLKSPELNVPGNAGLKDQVLALKWIKNNCASFGGDPNCITVFGESAGGASTHYMMLTDQTQGLFHRGILQSGSAICPWAYNGDITHNPYRIAKLVGYKGEDNDKDVLEFLQNVKAKDLIRVEENVLTLEERMNKIMFAFGPSLEPFSTPECVISKPPKEMMKTAWSNSIPMFIGNTSYEGLLWVPEVKLMPQVLQQLDAGTPFIPKELLATEPSKEKLDSWSAQIR…	572	B
CG1121	MSFDIAVADQMRIALNYVKFKTNQQRLRSNDKVIADTVYGKVKGVKWQSIYGNNYYSFEGIPFAKPPVGELRFKAPVEPEHWSDVKRCTHVRAKPCQVNIVLKQVQGSEDCLYLNVYTRELHPHRPLPVLVWIYGGGFQMGEASRDLYSPDYIMMEHVVLVVISYRLGALGFLSLADEELDVPGNAGLKDQVMALRWVKRNCQFFGGDPDNITVFGESAGGASTHYMMLTDQAKGLFHKTIIMSGSALAPWAQTPTHINWPYRLAQATGYTGDANDRDIFAHLKKCKASSMLKVAEDIITMEERHQRLTMFSFGPTIEPYLTPHCVIPKSPLEMMRDCWGNSIPMVIGGNSFEGLLMFPEVNKWPELLCQLGDCENLAPQDAHVDEQQRKAFGKKVREL…	574	B
CG1128	MSSMAAFDQFKIGLKMVDFKVQQRRYRTSEKTVVSTTYGPIKGVKRKSIYGQSYFSFERIPFAKPPVGELRYKAPQPPEVWTEVRSCTSQGPKPLQKHFVFEMTDGSEDCLYLNVYTKNLYPTKPMPVMVWIYGGGFQFGEASRECYSPDYLLREDVVVISINYRLGPLGFLCLDDPELDVPGNAGLKDQVLALRWVKANCSRFGGDSANITIFGDSAGSASVHYMMITEQTHGLFHKAICMSGNTLSPWAVTPQRNWPYRLAVQAGYAGENNTRDVWEFLKNAKGSEIIKANGELCIDEEKKERIGFSFGPVIEPYVTSHCVVPKKPIEMMRTAWSNNIPLIIGGVSNEGLLLYSETKTNPKCLNELDDCRFVVPIELNMDRESALCREYGDQLRQCY…	569	B
CG1131	MGFDMATRFMDILKLTFKVISFKYEQRKLSTAIYSVIKTKSGPVRGVKRNTIWGGSYFSFEKIPFAKPPVGDLRFKAPEAVEPWDQELDCTSPADKPLQTHMFFRKYAGSEDCLYLNVYVKDLQPDKLRPVMVWIYGGGYQVGEASRDMYSPDFFMSKDVVIVTVAYRLGALGFLSLDDPQLNVPGNAGLKDQIMALRWVQQNIEAFGGDSNNITLFGESAGGASTHFLALSPQTEGLIHKAIVMSGSVLCPWTQPPRNNWAYRLAQKLGYTGDNKDKAIFEFLRSMSGGEIVKATATVLSNDEKHHRILFAFGPVVEPYTTEHTVVAKQPHELMQNSWSHRIPMMFGGTSFEGLLFYPEVSRRPATLDEVGNCKNLLPSDLGLNLDPKLRENYGLQLK…	567	B
CG1257	MESLQVNTTSGPVLGKQCTGVYGDEYVSFERIPYAQPPVGHLRFMAPLPVEPWSQPLDCTKPGQKPLQFNHYSKQLEGVEDCLYLNVYAKELDSPRPLPLIVFFFGGGFEKGDPTKELHSPDYFMMRDVVVVTVSYRVGPLGFLSLNDPAVGVPGNAGLKDQLLAMEWIKENAERFNGDPKNVTAFGESAGAASVHYLMLNPKAEGLFHKAILQSGNVLCSWALCTIKNLPHRLAVNLGMESAEHVTDAMVLDFLQKLPGEKLVRPYLLSAEEHLDDCVFQFGPMVEPYKTEHCALPNHPQELLDKAWGNRIPVLMSGTSFEGLLMYARVQMAPYLLTSLKKEPEHMLPLDVKRNLPQALARHLGQRLQETHFGGNDPSAMSPESLKAYCEYASYKVFW…	543	B
CG1082	MSDDYNEDAPVVQTTHGKVRGILLKSLYDEQFYAFDGIPYAVPPLGTLRFKEPHDLKPWHGIRDCSKPLSKCLQVSTLTKEVEGSEDCLYLNISVKTLNGDPMPVMVYIHGGAFKGGDSSRRAWGPDYFMKENVVYISIGHRLGPLGFLSLNDPDLEVPGNAGLKDVILALRWIRANAANFNGDPERITIFGHSSGSMTVQLLLASPQSEGLFHRAILLAGFSMELNRLPQMEYRLAKHLGYEGDNVDSQVLEFLLKADPALIVSADFFTPLEKRQGHNMPFKPSIESYSTPNAVLLAEPIDLQRTTWSNRIPIILGANSGEGMSIFSFVKMNPSWLKEFQCNPERVLPWTLRNRCDPGQRRQLGQALIHHFCEAHGHELTVDHTNGLVELFTHGFVHA…	541	B
CG9858	MLLRPCGRLIFTRFCSSMKVKVPVKQGVLVGRQKKLVNGLEYNSFLGVPYAEPPVGELRFRSPRPLERFQKQELDCSKEGNVSYQRDPFTLEVAGSEDCLFLNVYAPKVKSTRTPLPVMVWIHGGGFFFGNGNSDFHFPAKLMEQEVIVVTLNYRLGALGFLSLPEEGIHGNMGLKDQRLALEWVQENIASFNGDPNNVTLFGESAGGSSVHLHTFARHAKRLFHKAIMQSGTANMEWVFQNEAPAKTRRLAELLGGGDFGGDSKALLTFLQSEKATPTAILANTLKVLSPDERRRHLPFAFKPVVEDSSSPDRFLEQDIMELMHKKDCLGSMPVIMGYNSAEGLAIVVKAKQKLEAYEDDLARLVPRNLVLDPQAPEAQEAASDIRAFFFNGQALSKE…	562	B
CG3841	MPRFFQLTWALLLILIGFTTAVTFIGDDPVVELSLGRIQGDTMQSFGNKTIYAFRGIRYAQSPVGQLRFANPVPETSWGDEVFNATSDSLVCPQPGVVSLMSEDCLKINVFTKSFEDKFPVMVYIHGGANVLGSGHSSYEAGPQYLLDQDVVFVAFNYRLGALGFLSTNSSETKGNFGFLDQVMALEWVRDHISHFGGDPELVTIIGISAGSMAVSLHLASPLSAGLFHRAILMSGSATNHFDIDNLFWTRKLARELGCPMYDPTDVVECLRNETWTRIVEVCKAWETYQLVNMKWNYEIDGHFLHNHPTELIKEGNFNKVPLLISFTANEFDYNANVHLENQHLLHDFASNFVDYAPELFLYRHDAQIGEKLKDFYLGDNTTEINSENIENFGQIFSD…	564	E
CG4382	MWRLCGFVLLLCGLASGQNSDEDLSKAIPDEEDPIGSNKELSDLVITTALGKIRGTILPSQSGRNFYAFRGIPYAKPPVDRLRFQPPEPVEQWFDTLDATFDGPKCPQLGLVSGDVSEDCLRVNIYTKELPSESQPNVRRPVIVFIHPGGFYSLSGQSKNFAGPQYFMNRRLVLVTFNYRLGSLGFLATGTREAPGNMGLKDQVQLLRWVKLHISRFGGDPSSITLLGYGAGAMAVTLHMVSPMSRGLFHKAIVMSGAVTGQWSLPDHQMDVATKQATLLHCHTENVTEMMDCLKGKHYLEFANTLPKMFEFDRNNPLILWKPVIEPDFGQERFLVEEPIRSYQNDDFMKVPIITGMTKDEFVGPALSILQSPTLLSALNENFESLAPVFFMYNTSDAR…	580	E
CG4757	MLMLFVVELLVLLASSSVLSIEVDTELGRVRGANLTSRLGVNFHAFRGIRYAEPPLGDLRFVNPQPVKPWSPKIFDASEDGPMCPQPWDNMTDVSEDCLRLNVYTKDLKGRRPVIVFLHPGGFYVFSGQSKYLAGPEHFMDRDCVLVSLNYRLGSLGFLATGSKEAPGNAGLKDQVLALRWIQQHIQRFGGDPDSVTLLGYSAGSISVALHMLSPMSRGLFHRGICMSAAPYGPVKYKDNDLQLAKRQAGLLKCPQESIGEMVECMRRKPYLDYVSTYNGMFEFGWNPVLNWRIVVEKDFGQERYLIESPFKTARRGDFHKVALITGITEFEFLSGAFFDLRNESIVNRYNRDWEHYASIALLLEQNSTQSRAASRVFREKYMPESLDKLEYPKSLKGM…	550	E
CG9704	MGELEEKETPPTETTAAQQEALEEPKETDKMLDKKEDAKEKTPSPQTSKPASPNAGKKSSPVAEKKIDDAELAKSKSGNGEEIIDIPAENGTKPDSADDKKISKEEREVKPKKIPIGGLKLPGFFMKNKPKADGDGAEGELLEKEKEEDKDKEANGDAATGSGKDEQKSRPGLGERLRSFFARKPSAEKEKKQLVNGDADAKSEATAEATPAEDASDAPPKRGLLNAIKLPIANMIPKKKSNDDVELGLGKAGLASMETLDDSLKDQDTVDRAPVKTNGTEELKGELKDEKLAAEEKLAAEEEEQNRPVSLLTRLRGYKCSVDDALIVFGILLFVLLLGVIGYVLTHETLTSPPLREGRYIMAVTGCGPVEGVKEDGAFAFRGIPYAKPPVDRLRWKPA…	846	N
CG12869	MWNALRIQQILRLLPILIHLSPYISAQQTHIKLEQGDLIGLKVFPDGTRGAVYAFLGIPYAQAPINELRFAPAKPSSSFNRTLQATTMQPLCPQLANTIYDESSDGSMPRSVSTDEDCLYLNIWTPESGMRYGKLPIVVIVTGEEFAYDWPRNRINGLDLAGEGIVVVSVQYRNNIYGWLSLGEQHRNVPGNYGLSDVQMALRWIRRNADAFGGNPDHITLLGHGSGGAPLALVATLEDSSQVKQLVLMSPGPIMRALGQNHQKWIVETGQVLVQKLGCQFEEAQRRQLMGCLRRKSREDLLRAYESVYNHGNGSSQLGVILPEGLPLEQRLRNKTLPPVLLGITSNEGAFLQDYWLDVAREGQVALHKYINHTLLPNVMRALESVGEESSTQLAAIRW…	685	N
CG7529	MRRRGVYVMLTLCGVLTAGLTAFLVIFLTGGQGADASETATVTVELYNGQGTVLGNYAYTAWTDRAFMQFRGIPFAEPPIEELRFRPPVARSPWTGTLNALNFGQRCPVITNLDSQMSDAELEDCLTLSVYTKNLSASQPVMFYIYGGGFYNGSSEDHPPNYLLEKDVVLVVPQYRVGALGWLSTYTEELPGNAPIADILMALDWVQMHISSFGGDPQKVTIFGQSAGAGVASSLLLSPKTGDNMFKRAIVQSGSIFASWAINKDPKAQSRRICIQLGCSGCEQHDQLVKCIQKAKVIDILKATASESFSPIVGDLHGILPQQPSELVKSYRRQIPILTGFTQHDGSFVLASYYDALAAKVANVSSLSVRQFSQGINDLVNDTSGLTDNILNRLLFKPQ…	559	I
CG9280	MKPLLLVLALCGAQVHAHSVGLRPDYNDYSDEDTRRDWLPEPLKPVPWQSETRYAQPQEAVVQAPEVGQILGISGHKTIANRPVNAFLGIRYGTVGGGLARFQAAQPIGYQGRVNATVQSPNCAQFPELDRLRLSESRGENVDDCLTLDIYAPEGANQLPVLVFVHGEMLFDGGSEEAQPDYVLEKDVLLVSINYRLAPFGFLSALTDELPGNVALSDLQLALEWLQRNVVHFGGNAGQVTLVGQAGGATLAHALSLSGRAGNLFQQLILQSGTALNPYLIDNQPLDTLSTFARLARCPPPSINPSAQGLKPLYDCLARLPTSQLVAAFEQLLLQNEHLGLTQLGGFKLVVGDPLGFLPSHPASLATNSSLALPMIIGATKDASAFIVSRIYDQLARLQ…	1026	I
CG9287	MQLLWWQIVSLLLVLQSVVESRVRGRQYDEEKDTIVELPTLGSIQGKILETAWTKREVLQFVDVRYAEPPTGLHRFKAPRPIEPWEDVMDATAEKIGCPSVVSMDSLRRLDDVLDVEDCLTMTITTPNVTSRLPVLVYIHGEYLYEGSNSEAPPDYLLEKDVVLVTPQYRLGPFGFLSTKTDEIPGNAGFLDIFLALQFVKHFIKYFGGDPSRVTVAGQVGGAAIAHLLTLSPVVQRGLFHQVIYHSGSAIMPIFLEEDPRKHAQEIAKKADCKMVTVRDLNTCLMELTALELLTAFMEHALEKSDLGIGHTGGIQFTIGGPSGVLPKHPYDLMLETNFSYPAMGGCPKNAGSRVLNEIVDNDFEGKIPDDEYNTYNYIDHVIRQTVGTDKTMLLTSFV…	625	I
CG9289	MARFSGVVLLLAIVLLAVFVAQGLAEKNANRQKQQKPRPGNQNFGIQKNKRPKPQKVQKQKPNKQQGQNGQEPKVFTTTVPDLGRLRGRTLTTDWTGQKIMQFLDIPYGKAERFRPAEPAPSWKGVLPAHRPHAGCPSIQDLIVFAKLEEDGFDVEDCLRLSVNTKAMEGKSLPVMVYIHGDFFYDGDSVEAAPGYLLEHDVVLVSVRYRLGPFGFLSTLTDEMPGNAAVTDIILALKWVQQHIASFGGDPQRVTLFGQVGGAALVNVLTLSPAVPAGLFHRVIYQSGTALSPAFITDAPLGATKAIGRIAGCKQSTKVDQLNKCLNRLNATMLLAAFSVHGENQPSLSGGAYGGVQLVIGGPSGILPEHPGRLLAAEKFQAYPTMGGSVKHGGTFMLR…	674	I

## Sheet: B. mori
Supplementary Table 4. Bombyx mori CCE sequences used to construct a phylogenetic tree.
gene ID in phelogenetic tree	AA sequence	length (aa)	clade
Bmace1	MRVVLAALTALAARTLAGPHEHRVRHHAPAPPQPYHGHGEAVRYNPELDTILPRLEDHETSSKRASDAETSSKRTKYEERFYSNHERAAELMADEPVSEKGDEEDPLVIRTRKGKVRGITLTSATGKKVDAWFGIPYAQKPMGDLRFRHPRPVEDWGDEILNTTTLPHSCVQIVDTVFGDFPGAMMWNPNTDMQEDCLYINIVTPRPRPKNAAVMLWVFGGGFYSGTATLDVYDPKILVSEEKVVYVSMQYRVASLGFLFFDTADVPGNAGLFDQLMALQWVKDNIGYFGGNPHNITLFGESAGAVSVSLHLLSPLSRNLFSQAIMQSGAATAPWAIISREESILRGIRLAGAVHCPHSRSDLAPMIECLRKKNADELVNNEWGILGICEIPFVPTIDG…	683	J
Bmace2	MINYGKIVFTKLLLCVLISGTFARSWANHHDTTTSTTQTTPTTSPVPKNIHNDPLIVETKSGLIKGYAKTVMGREVHIFTGIPFAKPPLGPLRFRKPVPIEPWHGVLEANLMPNSCYQERYEYFPGFEGEEMWNPNTNISEDCLYLNIWVPQHLRVRHHQDKPLAERPKVPILVWIYGGGYMSGTATLDLYKADIMASTSDVIVASMQYRVGAFGFLYLNKYFSPGSEEAPGNMGLWDQQLAIRWIKENARAFGGDPELITLFGESAGGGSVSLHMLSPEMKGLFKRGILQSGTLNAPWSWMTGERAQDIGKVLIDDCNCNSSLLAKDPSLVMDCMRGVDAKTISVQQWNSYTGILGFPSAPTVDGIFLPKDPDTMMKEGNFHNSEVLLGSNQDEGTYF…	638	J
Bmnrt1	MEREHEVLSETGTNCNIASVSETMSDINQTKLDTLEKKAVHLRLVLEKDFKAADLKWSLFVAAAFSFRYESCLRPFPPAFMKSGIKDMDELLSVITDVPALDLVLQQLDNLEALPNISDIIDLLFYVLVRLKEPTLKTVPTDVHEQILAMANTMTTPSKPQHIFQVISSNKSTVELKWKELSKNHNVFYAYHGNRLENFYTILNFGLQQHLNKNTSLGNGVYLSPELSATIPHSHGGFGWGASCIGGHLSCVALCEVVDAPEGINYQKPVSNEGDGLYKDGKTDHMRVNGETQVTQYIVTNCDLVRIRYLLVYAKQPASLRFHARNSNRNGGFRHWLARHKLLSILLGYGLLLATIGFANNQPIQYYYKILFKKIDMALASTRIKVFTESTLTPIEVYY…	789	N
Bmnrt2	MSTTEINKIEFEDEKTLDKKEIEAEEKEVMLKAEKEAIDDFAELRAEAEGPVKAALSGDVTEQGREVKPKYIPIGAIKMPGFFTKSSEKSKDPEDGKVATKLPLKERIRQKKFIIDDIVVCIVALLVAMSVIIGSLIGACVGPPVERPLRLGRYITASTGCGPVEGILDEGVYKFYSIPYAVPPIKEKRFTYAQPLNNLSLCWNETYQCHVPGPLCVQFLENGTITGEEDCLTLDIMTPHVRYDSPLPVVVLIGANTLAGGISPAQPSALYARTEEVIFVRPNFRLGSFGFLSLNILSKSKYPHTSGNYALSDLLAALRWIHLNINHFGGDPEMVTLLGHRAGATLTAALTTVSGAHKLYTRVWLSSPSVIFPGEVLEQSQKNNEQFRQMSKCNDADCL…	643	N
Bmbe1	MLLKLYFLAAVVVTATAQGFNPVVRVSQGLIQGSWKVSTKGRPYASFQGVPYARPPIGKYRFREPQQLKPWTGVWDATRTLSSCLQYDPFVGTITGSENCLFVNVYTPKLTPTASLPVMVFIHGGAFMYGEGGFYDAGNLMDRDMVVVTLNYRLGPLGFLSTGDEVAPGNNGLKDQSFALHWVKNNIQMFGGNPDSVTLTGCSAGGASVHYHYLSPLSRGTFHRGIAFSGSAFASWTHSVKPAQKAKTLASIVGCPTGTSKEIIDCLKYRPAEVIVRAQIEMFDWKVHMFTPFTPTTEAPGVREPFLSQYPYHAAIAGAMAKLPLITSVTSEEGLYPAAVYQTEPGMLNELEAHWEQLASNIFEYNDTLPLNLRADVAAKIKEHYLGGKPVSQETYPQL…	558	G
Bmbe2	MPNKFTIEAPRLRVNFVFFTFTLVLFCYDASSEERPAVTTPLGEVAGYYMTTRGGRQISAFTAIPFAKPPVGELRFKAPVPFGPWEGVLDATKVSPICVQRNPYVRQKDIVGQEDCLYLNVYVPATTNDDKSKKELLPVMLFLHGGGWMCGDATTAMYGPEFLLDRDVILVTTNYRLGPLGFLSTKDEHCPGNNGLKDQQEALRFIQQNIESFGGNKDSVTIFGESAGGSSVHFHMLSDTSAGLFHKAISESGTALVPWAEAPPGEALRNAFKLAKFLGCPPAPSEKFIACLRTKDSYEIIGTEFDFYAWDYEPMTPFKAVVEPDLPGAFLTRNARDTPKAPSVPWMTGLTKNEGCLKSVWITANDTRYEEFISGFDTIAPVTFYYDNSPFPEVITKKL…	572	G
Bmjhe1	MCTKFAVLLYYVIVGSVRAYSSPAASPPSSCNVVAQTESGWVCGRTRRAEASTLYASFRGVPYAKQPVGELRFKELQPAEPWTDYLDATEEGPVCYQTDVLYGSLMKPHGMDEACIYANIHVPLNALPAAGETPTKPGLPILVFIHGGGFAFGSGDADLYGPEYLVTRNVVVITFNYRLNFFGFFSLDTPKVPGNNGLRDMVTLLRWVKRNARAFGGNPDNVTLAGQSAGAAAAHLLTLSKATEGLVSRAILMSGAGTSTFFTTSPIFSQSINKILFSILGVNSTNPDEIHEKLVAMPVEKLNEANRILIDQIGLTTFFPVVETPHPGITTILDEDPNILVQQGRGKDIPLIIGFTNSECHMFQHRFEQIDIVSKINENPAILVPSNLLYSSTPETIAL…	570	D
Bmjhe2	MFVLLLLILGSAIYAESFTKKCDVLVKLDSGPVCGREESANKNTKYFSFQGIPYAKPPVGARRFSELEPLEPWSEPFYAYEEGPACPSRDITYGSITVKRKGMSENCIYANVFVPASATLNSDELCEDNSLPILVNIHGGGFQTGSGNRDLHGPELLMLKDVIVVNFNYRLAIFGYLSLASHKIPGNNGLRDMVTLLKWVQRNAKVFGGDPKRVTILGESAGAASVHLLMLSRASKGLFNKAIIMSGTAIPNFYSSSPIYAKYISDMFLGELGLNSTELTSDEIHQTLTELPLDDIMRANDVVQYRAGLTSFVPVVEKEGHDYTRIIDDDPITLINQGVGKDIPLLMGFNKDEGEYFKWIITIYNIVDRYKSNPAVILSPRLAYELPPQEASAKGIFVG…	566	D
Bmjhe3	MQYNAIRKLFTPSIKHICKFITAVYGEFCITECEVPVNIDSGPVCGREETAENNTKYYSFQGIPYAKPPVGSKRFAELEPIESWSDPFYAYEEGPACPSRDLVYGSITVKPKGMSEDCIYVNVFVPATACLDCDCLKDDLLPILVNIHGGTFNTGSGNRDLHGPELLMVKNVIVINFNFRLAVFGYLSLASGKIPGNNSLRDMVTLLQGIIMSGSAMANFYTASPIYAKMIAEMFLQELGLNCTDPDEIHKTLTELPLEDIMRANDVVQYKTGPTSFAPVVEIEDHEYTRIIDDDPIALIAQGRAKDIPLLMGFNRDEGEFAKWIIMILDVVNRYKSNPAIILGLRLAYALPSEEAFAKGRFVGKRYFDGEPTLDGLAKSMTDILFQYSMIKLAQWRVL…	560	D
Bmjhe4	MSHYTTALLGLLFVGCGVFCNEQCGVLVNIDSGPVCGKVEIAENSTKYYSFQGIPYGKPPTGARRFAELEPVEPWTDLLYAYEEGPACPSRDIIYGSITIKAKGVSEDCIYANVFVPATAQLNTDELSEVSLLPILVNIHGGAFNAGSGNRDLHGPELLMVKDVIVINFNYRLAVFGFLSLASDKIPGNNGLRDMVTLLRWVQRNARVFGGDPDKVTVLGESAGAASVNLLMMSDAAKGLFNKAIIMSGTAFPSFYSTSAVYAKYVADFFLGQLGVNSTDPDEIHQILIELPLEDIMKANDVVQYNSGIASFVPVVEIEGHNYTRIIDDDPIVLIAEGRGKDIPLLMGFNQNEGETFRWLLTIMDALTRYKTNPAAILSPRLAYELSTEEALAKAELVA…	572	D
Bmae54	MRMWWRALSICAFALVLHTDALPPATLGDVVANAASSLNSMKVTGAWRRLSSTVSESVGLKHALRRLQAVPARAARLVHALVDRMRVGGGPIISTKYGALRGRKLVTRTTSQTPYYSFKGIRYNPKLAVMVWIHGGAFAVGSGNAFLYGPDHLVGAGVVLVTLNYRLGALGFLSLENEEVPGNMGLKDQVMALKWVRDNIEAFGGDSSRVTIFGESAGAASVHLHMLSPASRGLFHGAIAESGVALSPWALAQQPRERAFELGRELGIDTNSTAELLGYLRATPSELLVKAGARLAGAPGKSADLQSTVALPFLPAVEPDLPDSFLTETPRNSLPGADVPFLTGYNAQEGLILFRRLQRYPKLLVELDQEFKRVVPPELLQQNVTLNQKITDVIRAFYF…	568	A
Bmae53	MLRYLLLVVFFVKVFADEEEENRIVVLNDGAVSGKKYWNGDYYEFYGVPYATVPKGKDKFKSPLPAEPWEGVKEANSLSSVCEQVYLTDDPDDEVMLHGEEECLTMNLLVPEIANENNLVPVMVYVHSGAFAGGSGNMAKYNYLARHDVIAISFNYRVGAIGFACLGTEDIPGNAGLRDQIAALKWINKNIKKFGGDPNRVTLGGYSVGATMAELLMLSKATDGLVHKLILESGSALAPFAINRHPITTARNIAISIGFNDTGSLKDLNDFLINAPIIDLASKSKNFYLTNSTFGFAPCIETEIEGLEPIITQSPLDIINSGDYKKIPIITGFANMEGISRTIKFGDWRDKMNENFADFLPADLKFENEKSRDDFIKDLHARKSDKPVYLYEFTYVGKL…	517	A
Bmae50	MIRLGLVMLFLIPGTEQNVISIAQGKIRGRVRDGYVTYGGIPYGSLMLKGRFKQAGIAPVWPNIREFHESRCSTTSAAEECLQLDVNVPTSAAPTWPVLVWVTGSDGSYHSGQLVKKGVIVVIVRHRLGAPGFLCYERDIPGNAGAKDVIAALHWVRDNIIAFKGNPARVVVAGQGFGAAMVEALTLTPMAEGLFHGVILQSGSILAPWAFNYDAKDRAKVIGERLDKKRDYVDVFLNATMEELFIKSSESNTPYFSFGLCLEEPLKNEERFFLETPYDLFVTKKSKSVPMIIGYNSDEAYIFSSLLKEFKVINKLTKDISFLLPYELQFLNSREMNQVSRQIEDIYFRRNRTMTALLAYHRDVYFLSHVYRSASYHAAVSSLVYFYTFSHLGEVGVQK…	503	A
Bmae5	MLRSVALLGLLSAVGAWLRIDPLVETQQGLIRGLRSENGKFSKFLGIPYALVDEKNPFGPSVPHPGFEETFEAYDDSVVCPQVIKVTKVGIGSLQCLNLNVYVPNTATSRNKRPVMVWIHGGGFTTGSGTSRDYSYDDLVRHDVIVVSVNYRLGPYGFLCLDSPDVPGNQELKDQVLALKWTKENIEAFGGDASKITIFGESAGGQAVELHLLTDQDKLFNQVIVQSGSIYKPGIINKPDNSVPIQIASRLGFETEDFVAAISFLADQDPHLVVAASTSEGSTVFSGSAYRACVENEFDGIHSYLSDSPQNLKIKNIPVIYGVNSKEYLTLHASLVPEQYEVSGFKSFLKLAFNLTDDDMEEDVRHFYIGDETLTEELFDEFITFASDYYYGYPVERSI…	534	A
Bmae6	MLRLVALLGLLSAVAARLRVDPLVDTQRGLIRGLRSENGKFAKFLGIPYALVDENNPFGPSVPHPGFEETFEAYDDSVVCPQVTKGVGVGSLQCLNLNVYVPNTATSRNKRPVMIWIHGGGFATGSGTGRDFSYDDLVRHDVIVVSVNYRLGPYGFLCLDSPDIPGNQGLKDQALALRWIKENIEAFGGDVSKITLFGESAGGVAVELHLLTDQDKLFNQVIIQSASAFFAGGIRKPSNRVPIEIASQLGFETDNFVEAVKFLAGQDPHLVVAASTSQSSAIRGGTLRPCRENKYDGVGNFLSDFPENLRARNIPAIYGVTNKEFLTLHAYVTPEDYEVTGIRTFLERAFNLTDSEMEDHVRHFYIGDETLTEKQFDEFIDFASDYYFNYGVQRSIKKS…	475	A
Bmae3	MRLKVILPLLFFASISGEDFELPIVNIGQGAVLGSHAHDGEYFTFYGIPYADSTSGPHRFKAPSSPPKFEGAFVANRRDVKCVRPLGVGYEGTEDCLVVDVLTPNLDAAAQLPVMVWVKGKEFDSEYNQDFSFRNFVQKDVVVVSINFRESILGFLCLGTEVAPGNAGLKDIIAGLKWVKENIAHFGGNPDDVTLFGHGSGAAAVDLVTLSPLANGLVHKAIAQSGNAFAPWAVTRDNLNYAIQVAEALGHIVTNIQELSEIFTRTSVAALMAVINELDLTDNSLAFAPCLEREALSVESFITKSPYQTILDGEFLQIPFMTGFVENEGTIRATEAIEHDWLQRMETSFPDFLQPDLQFENAEGESAIAEEIKDFYFKNELISMFNIEDYLSYHGDTMI…	650	A
Bmae2	MCVSIKWVVLWSLWAGRLVRQPTPAAAGLEPEWDGVFNAVNEHVRCPQKFADNFVWGQEDCLIINIFHPLYSEVDKLLPVKVFIHGGGFREGSSSRLLFGPDYLVRKNIVLVTFNYRVAVTGFLCLGIKDAPGNAGLKDQVAALKWVQRNIKVFGGDPDNVTIFGESAGAASVSLHIVSPASKGLFHKAILQSGSSISPWAVEFEPIKYASRVAEVLGYKTMDPYQLYDIHMNHTIESIVGAPVPLLESQVAAAQLINSPCIEKSHPGVEPFLLESPFDIFTRGEYNKVPVILGVNDNEGYYFSGLEDSSTLTRFKFEIGLPRNLRIPAELKKERSNTGEDRPFTHKMVSDESKFYENSRYR	362	A
Bmae16	MWRTLLFGAFILGQTKTEDAIDEWKEVLLDQGPVRGYKDPEVDVFVFHGIPYASAPKGPDKFKVREQKLKLIGTVEAISIEFMLKRLCTTELELVTAPLPPPTWKEPFEAVDKGVMCPQHPVDMGFKKKFIYNEDCLIANVFVPDADNKNLPVVVYVHGGGYQVGFGNSVTPKKLVRGEKIIAITFNYRLGAHGFLCLGTKEAPGNAGMKDIVALLRWVKKNIEKFGGNPEEVTIAGYSSGAAAVELLMLSDLTRGLFNKAIPESGSALASFTIQRDPLANAKKFAKKMNVTDVDDIEVLEKFYTKASFKKLTANTFSGAPGTAISFEPCIERDIGEEAFLTEAPVNIISKGKYQKVPILFGICNMEGLVRVNYFEMWLEKFNSKFSQYLPSNLKFESQ…	846	A
Bmae18	MDFMPWFLLLMLSYVQANLVRVDPLVLISNQGLVRGHKAADGDYSIFLGIPYAKVDVNNPFSTATDPIAFPEIIHDAVDEVRCPQTSSSVGEQTLNCLRLNIYVPSAASSRNPMPVLVWIHGGDFATGSASDYGVKNIVRHGVLVVTMNYRLGPYGFLCLDVPTASGNQGLRDQYKALSWIRNNIASFGGNPYNVTIAGQDAGATSVLLQLYSDNEKLFHKVIIESGTPQSEGMFVNADVEAAIKLAVHLGLNTTETEEAIQFLTKTSPDLVVAAAKELELQLKPCRERSFSGISNFVESDPYSLTNKKKVRNTPIMIGNTNKEKKSLSADYFSTDPFYEKLKSNFNLDEAQIEKAAKNVRHFYIGDSSLSAEVASELQDFESDFVYNHPSQRTITQLL…	531	A
Bmae20	MDVVSKNVSRVVNIEQGPVRGYKYEGDGFYSFYEIPFATIKERFQPAVSPEPWTETFEAVKKGIICPQAEVVYVDLSDKIMQEDCLVMNIFVPDTEQENLPVMVDIHGGAYYSGLGNAHRFTDFAALNNVIVVTFNYRIGLLGFLCLGTEKIPGNAGMKDQITALRWVKRNIATFGGDPNDVTITGCSAGGSSVDLLLVSKMSEETILTRPNIKRPDGLVEYAPCIEKDVGQEVFLHDAPYNILKSGNFTRYPTMYGLTNKEGLMSLGDFNPWIDLMNEDFSAFLPGDLKFESVDEMKEIAEAVKKFYFGNKPIDSNMDMNFVDYQTDTLFVYSMLRNIQLQIAAGDTNIYLYEYSYYEDDSEFQGATHCRQTRAVRDETDDGFSQEYINIKRLLRQAW…	476	A
Bmae22	MKPFTFLAYCCVTILKVHILGNVLESKLVQTLQGPVRGYRIPETDVYAFRSIPYATAPTGPNRFKAPLTPPNWTEPLDAIDKGIICPQPLIKALPALNKHMQEDCLITNIYVPNTNETKLPVAVSIHGGAFQIGYGDMLPTDKFTKNTNVITVTFNYRLGAYGFLCLGTESAPGNAGLKDQVSLLKWVKENIESFGGNPNDITLMGCSAGGVSVELLMLSKSTDGLFNKVIPESGSSIGFISIQQNPIETAIFNAKSLNFTNVDDLQALEEFYKSVPIELLVFDDFWDSSNFAYSFIPCIEDPTSTDAIITDVPANIIMSGDYKKLPMLYGLTNMEGLNRFQYFELWKTRMNEDFSEFLPIDLHFNNEEDKLNVIKSIKEFYFGDQQLDEKDLLGFIDY…	496	A
Bmae27	MFVLLIAFVSFTSAQDSLQVNTTEGTVEGSRAADGDYLTFYDIPYAGPTSGENRFKAPSPPTNYSGVYHAVNRNILCAQPNTRGLIGVENCLTLSIYTKNTTTPKPVFVWLNAEQYASTTTPVFSYKKIVEENIVFVPLNFRLSIFGFICLGVPDAPGNAGLKDILQGLTWLKSNIAGFGGDPNNIVLIGHGSGAALVDLLTMSPRSKNLVHKAIALSGSALSPWAVAYEPVRYAEVFGGVLGITQKSREQLAKLLQTTNPNVLATALEEFKFTNNSLIFAPCIESQNSDPNETIITDAPLNILRSGNYNHVPYIAGFTTREGTLRASEVVFNRWLEGMEANFTNFLPVDLDTNGNATAVQDIKRFYFGDRTIDMGTIEDYLEYQGDTLILLAVIRTAR…	559	A
Bmae28	MPLTNATGFPVIIWIHERSYCHGPDFFIDENIIVVTVSFRTGIFGYLNTGDGFALGNMGAKDMLTAIKWVKSNIKNFKGDVDKITVIGSGEAAASVATFPLTSAAGNLFSRIIVESGSALSPENYRNYNFEISNKLYWNLNGPFKKLNRTNLYQILANSTTNELLLASGALFDSTEYLVPFEGKIDEYGSKRYQEIRQRIMDFYFANGTIGERSLRRYAKYVSDQAIYPVIRQARSHSEKSGNNVYLYRFSYKGCLNIVRDLLLRNFKLTGATGGDEVCYQFTCKSANRLYRSEVSSERRDPTPEGSDEILGDLKWTPMVDLNNIKGLNLNRKIKMIELPEMRRVRFWDQLKSEYFEDFD	360	A
Bmae29	MTALNIVFLTFLCVAVEGGVIVETNSGKVEGLEVKSIIKDEKFYSFLSIPYGKAPIGALRFKAPQPHEGWTDVLNAKKERKQCAQYYVPMRPVDEVGFCGSEDCLHLNIHTPKLPNNNEPNLPVIVFLYNEYFRITYNASKEYGPDFFMKEDVILVTISHRVGTFGFVSFGDDLLPGNSGVKDVILALKWIQSNINKFGGNPFKITLMGQDGGAAMVDILLHSPKAKGLFSGAILQSGTAYSSMFFNTKPKDRALAIAEVLERKLSNSAQFISELGSIAAPKISESELMAIHADDSRKYQVPILANGPVVEHDHPDAVITKRPEDSFLDVEIPIMIGYNTRESIEMMERYLRKPQYLTFADRDFLMMFPIRVDYHFELNTNVYYEAIQEIKDFYLEEGY…	1028	A
Bmae34	MRSLPKKPPKWRGVFDAVHRFGSCSQAVSLLRFGTEDCLELDVYSPQGAKPGHKLPVMMFIHGGAYYYGSKWHYDAEFLVEKNVVVVVINYRVGVLGFLCLNNTANLGLKDQVAALKWIKNNIAAFGGDPDNVTISGQSAGASAAGMHMLSKSSEGLFHKAILLSGTPLAPWAFNHESKKPAFEDAEKFRKVTNEQEVYEVFKTANIVDLLNNCGDTSINPRYFKYSPCIDSNFSNPFFHDTPRDTIVSEITFDFSQFSPEVKKVIEGKLRSYYFMNKTITKDAVQGVVNFYSDWMAYSTADAFSKLMVKYSDQPVYSYIFSYLGNRNFAKALFGYKSRLKGASHSDDIFYIFKPGGVPMVLSKPDRMFIDRITTLLTNFMKYGNPTPTPTKLVPVRWP…	445	A
Bmae35	MHLAFFLLLFNYVRCFEYVELKTRIGVVRGHRNNYGAEFLGIPYAKVDDGRPFGNSLPYPYFEAPFEASNPSTRCPQVGRVIGGTQQCLTLNIYVPENANATQTVPVFVWFHGGGFKIGSAGEYGGKHLTQHGIIVVTVNYRLGPYGFLCLDEEVPGNQGLKDQVTALKWVQANIGDFGGDKSKVTIGGQSYGGGAVDLHMYSSDVKLFDKVIIQSGSMYAEGAFVKSDLNAAIKLSGQLGCSTNNTKDALKCLATRDSLTVVKAAKDIGLKLGACKEKTMNGSENFITQDPFHLDFVKRDDIAVLIGHNSNENFARFANQSEEFYERLANVFREKFVNNFVLSENDLDQLSNNTQAFYLGKNGSLTAKELKEFNVQLSDFSSDFMLNYPVEWSIKNYL…	466	A
Bmae38	MLRPVTLAVVVVALLSAAGARLRVDPLVETRKGLIKGLRSENGEFSKFLGVPYAGTSRDYSFEDLVRHDVIIVSVNYRLGAFGFFCLDSADVPGNQGLKDQVLALKWIKENIEAFGGDTSKITLFGESAGGVAVELHLLTEQEKFFNRAIIQSGSVFIPGAITKPDNSIPIRMASRLGFETDNFVEAIAFLADQDPLLVVEATKSDGPVTLTDATFGSFTACIENEYNGVYRFLANAPENIDPKKLRNIPVIYGVNDHEMLILHAFISPEQYEQPAIRNYMKIAFDLKENEIEEDVTHFYIADEPFNPEVFDKFINFASNYLFNYPVERSLKKILSAGNEDIYYYVFSYDGGRNVMKKHLGITAPGAAHADELGYLLAVDLQPGELVAEEDQLVIDRIT…	469	A
Bmae40	MKRRKYLVLFTLFLTNLVDQPAPEVVIEQGILSGKISPDGSFFEYVGIPYATSNINTRFKAPLPPPSWNGVFKAVEETSMCPQASIIGIIGSEDCLTINVYIPALARKPLPVMVYVHGGAFVLGSGGKLLYAPDFLVKHDVILVTFNYRLGALGFMCLGIKDAPGNAGLKDQIAALRWVKKNIAAFGGDVENITLFGQSAGGTSVSLLLASEATSGLFKKAIVMSGSAISSWAINRQPIWIANLVAKELGYNTDNPNELYEIFSKIPFKELVRAKPEKPLGKYLDTQLLHLPCIEKNIPDVEPALTDLPYNLLTKKPKKIPVMYGSASKEGLLIISKDNEETVSERDSKYLFASDLEFQTEEEAEKEDNKARQLYFNGQRMSMNNIMNISDLMSHLYFE…	545	A
Bmae41	MKCRKYLVLFSFFVMNSAGQPVPNVTIEQGVLTGKISKDGKFFEYVGIPYATTNISGRFQAPQPPPKWDGVFKAVDEFIQCPQPTAFGVVGTEECLSINVYAPTGAKGPLPVMVYVHGGAFLLGSGGKILLGADFLVKHDVILVTFNYRLGIFGFLCLDIKEAPGNAGLKDQIAALKWVQKNIAAFGGDPDNVTLFGHSAGATSVSFLLASKAAEGLFHKAIMQSGSSIANWGLQLDPIMIASETAKELGHDSKDPQELYDIFAKTPYKELINVTVGKPLGQLLISNLLHLPCIEKVFPDSEPVITDLPINLLKNAPKNISVIYGSNDKEGLFFVSEVTNETLAENNKLKITGSDFKFSSDLETDEVTSKVKEFYFGENTISWETRMILSDFYTHLYFE…	541	A
Bmnlg4	MGNPDNPPFNSTPTLDSNSGNFVRKSAKFKRQIIRDHDSVMHLCAKSNMYSKYLYYVFAEICSRSSYFIFGPTLQAKYPVIVFIHGESFEWNSGNVYDGSVLASYAGLVVITINYRLGILGFLNANPIPHLKARVANYGLMDQIAALHWVQQNIALFGGDAGNVTMLGHGSGAACINFLMISPTVMQGLFHRAILLSGSALSSWALVEDPVSYAVQLAKQSNCTLPEDIVKDHELIVDCLREVPLEELMSEAINTPSYLTAFGPSVDGVVVKTDYAKELLTYFIPNDLQGFTSVSGVNNFKADKRSGDRIFGIRGGQNKYDLLFGVVTSEALWKFSAQDIQNGFEGERRDRIIRTYVRNAYTYHLSEIFFTIVNEYTDWERTVQHPINTRDAAVLAISD…	867	M
Bmnlg5	MQNDQPSDENYDDHDREHDPVDYAKVNFDHNPFFNSEDFLQKFYNSDNSAYSNYDDYKKYYLNPSNPIPKSKVKFKISSRIVQTKYGKLQGIVLAMDEHRYLSPLEVFLGVPYATPPVGSNRFSPTRTPSPWDGVRVSDRPGPACPQTLPDIEDERTILEKMPKGRLEYLKRLMPYLKNQSEDCLYLNIFAPLQMDETKLELPVLVYIHGESYSWSSSHPYDGAVLASYTDLIVVTLNFRLGVLGFLNANPVPHLKARVANYGLMDQIAALHWVQQNIALFGGDPNNITLMGHGSGAACINFLMISPTVMPGLFHRAILLSGSALSSWAIVDDPVYYSLKLAKHMNCTVPEDLSKDHEVIVDCLREASIRDLLAADISPPNYLTAFGPSVDGVVIKTDF…	982	M
Bmnlg6	MPKFQRPNYILLCPNLILDLFVPDTGDLLVNPENGYEWGGQTVAHAPVGKQAQNAINIINAVLMRKSAVAQLTKYDLMLGVTKAEAYFAFSGDDVQYGIEADRRSKILKSFVRNTYSYHLSEILATIINEYTDWEKPVQHPINIRDETLEALSDAQVVAPMVLTADTHSALRRNSYLYVFDYQTKYGDYPQRQGCIHGEELPYIFGAPLVGGLAHFPRNYTKAEVGLSESVMLYWGNFAKTGNPNEAQETDPIRAGRQERVRMKNIEWTAYEAVHKKYLNIDIKSKLKNHYRAHRLSFWLNLVPDLHRPGGEDVPPAHHQLENEDNSIQPTPKTYSPAFKKTTDVIADTGLATKIPVLNVLNITSSLNFNIVGMNSVTQSTASEVQKSETTAASPPEDG…	575	M
Bmnlg1	MECLWRWCAALVLATLAAAGPRYSSRIVHTHTGAIRGIIVEPASRRLEPVEVFLGVPYAGPPPRLGVPPAPPGWSGTRLADAFAPVCPQRYPDISNKSAALSNMPLGIYNELKATVPMLANQSEDCLFLNIYVPGSGARGVEAPYAVVMWLGAPSHEWGSANTLDGAVLAARAHLLVITVNYRIGLLGYLTTGLNTDPVQQAGGSAQLDVAAALGWVRRNVAAFGGDARRLTLAGHAAGAALANAMLMMPDTKGLVSRVLLLSGSALSPTALAPDATLTRDHTAQALRCIPENSNDENWFVECIRARPLAALLAVEAPKARFLSGWAPSVPAGQPPTRALHASDTFLDCSLAIVVSTTESYQFFNEDDIRHGFEEEHRNRILRTYVRNVYRYHRNEIFA…	648	M
Bmnlg2	MHAGSAALHAWLVCCAAALSSHKYSTRVVRTKYGTLRGIVVHSHPQVEAYLGVPYATPPLGSLRYMPPVTPSQWRTTRLADAPGPACPQAPPAAVPRDDALLVHPRARIRQLERLLPVLANQSEDCLYVNLYVPVNGGEGDGGGGGLPCLVFVHGESYEWSTGNAYDGTTLAAQGNIVVVTINFRLGVLGFLKTGAKGSAQGNFGLMDLVAGLHWLRENLPAFGGDPERVTLMGHGTGAALANFLAVSPVARELLKRVILLSGSGLSSWALQREPLTIKRKVAEQTGCHGDLLEDDLAPCLRNKPLSELLAVKLDPPRFLPGFAPFVDGTVIVNPTSAPPPSDSTRLGAGAAAVANAAGYELADFSHRELLFGLTTTESYLEFSAQDLEFGFNESRRDR…	935	M
Bmgli	MFSKVFLFSLSCVSVASQSNKDLYNGQFNAYYNKQDQNKEYRVPSPGDTDYRTYIYNNRRYGTDPTRSNPYNPNINQPGGFPYNPINTNPLDEQFKYNTNRDPNNPDALFPGVLGGWREDLQGRERRDSRQLKRDIFVTTSYGQVQGFKVYLYDNPDPDSGYRPWLTPVERIQGEVSVFLGIPYARPPVLEGRFKPPRQHPGWQLIQAVDWGPACPQPVRFTGATKGIRDMDEDCLYLNIFSPNSEAGSTAQRYPVMVYIHGGQFMSGASNLFPAHMMAAFYNVVVVSLNYRLGALGFLSTADENSPGNYGILDQMMALRWVYDNIAAFNGDPGSITLFGPGAGAASAGILAIAPQTRHMVARVIAQSGSVLADWAMIEDKFRVQNTSVVFGRMLGCPT…	854	L

## Sheet: A. californica
Supplementary Table 4. Aplysia californica CCE sequences used to construct a phylogenetic tree.
gene ID in phelogenetic tree	AA sequence	length (aa)	clade
Ac nlg4X	MEFEEKFLRLFVIFSTLPFLLHAQPTLISQDVDPSNSNYTAVTTGVGTFRGRRFNVHSDTSVDIFLGIRYGKAPTGERRFARPEAFGAVEGARNAIVHGAKCVQRIIQGDPLLEGVPFSEDCLFLDIYTPWSANQSDNTPKSVMMFLHGGGYYGGTGALYNFTNVALYDVVVVSVSFRLDIFGFLSSGDDVIPGNFGLLDIALALDWIKDNIGPFGGNPDDITVFGASSGASSASILYLSPLTRGKFQKAIMQSGVANCPWSVHPVNNMAFDPERISKELGQRANCSMRSGPAFSSDLLTCLRQMDVDELVNASVALQVESYGGNMVWLPVVETTFGVLPDTPIKLLNDKQNLMHIPTIYGYTKEDSSWLVPDPENDGVTLIEFNTILRSIIANLFDSD…	612	M
Ac nlg2	MNVFLFLVVVVGGVSGVLGAPFEKNTEPQYTTVTTLYGAVRGVRQQISPGKALDIFLGIPYAKPPVGQLRFARPQFPAPWKDTRDALKFGAQCAQRPLTSSPQADLPYSEDCLYLNIYAPRFNTSTVKLPVLFWIHGGGYFGGTGALYNGTELALRGVIVVTINYRLDLFGFLSTADSVIPGNFGMLDQVLAMEWVRDNIAAFGGDPNDVTLAGESAGASSVSLHLLSPLSRGKFHKAIMESGVSLCPWAWNHSNVTYYAPKPMANTLGLGVGCSHEDSHELLSCLRRIETDYLVNTSIGLQKTLRDAMVWVPVVETTFGFLPNTPEILLQKGLIADVPTIRGYNKNELALSVKDPEDQGYSIEKFGELLILSAYFFFQKDIVATVAEIELVYRRNQTS…	601	M
Ac nlg4	MAVILLLLVLFTSALGASSLHRGQRAADDGFLMVNTSYGTLRGKVDSTPSVPVAKFLGVPFAKPPTGPLRFKAPVKSDSWDGVRDALTFGDECLQGDNPNFPFRGGNTRPPRSEDCLFLNVYSPTQRNGQALLPVMVWIHGGAYLMGSGSAYDVTTLATKGVLVVTINYRLNIFGFLSTGDDTMPGNYGMMDQIAALKWVRDNIASFGGDPNLVTIFGESAGSASVSLLTLSPLAKGLFQRAVMESGVSLSPWAVEFPGNRVSSRMAARLASQAVQCDDLNNSTALLSCLQQADAVKLLNASTTLANVLQVGLVLWNPRVETTFGFLPESPSTLLSRGQINHVDTLRGFNSDEFGIFTPIFSRKPPVQITAEVAKQVIGAQVAQFNQLNQGKLLGLLVS…	579	M
Ac ace	MGLDYVIRLLAQCHVVLVLMTRLAGAQERPIIETDKGTVQGVTVFADGKKVDAFYGIPFAKPPLGDLRFKPPAQLDSWEGVLDASRLPNSCMQGFDRTFGNFTGSNMWNPNTPVSEDCLYLNVWVPRTNPPYKDKSVIVWVYGGGFYSGSSTLDIYDARYLAAENDVVVVSMQYRVGALGFLTLNTPEAPGNAGLWDQRMALEWVNRNIHKFSGNTRDVTLMGESAGACSVGLFLICDLCRGYFHKAILQSGSPAADWTALPKEEMWRRSESLASHYNCNKPGDPDYVIRCLRQVNATEFPIREPYMTHGIMQFAFVPVIDGIFIRQDPQEMLRLGRFKKVPLLLGSVENESTFFIIYINSEIFRLDTDSPLTAQDYRNLMTQQAFKFYPYYPHKLNDF…	621	J

## Sheet: B. glabrata
Supplementary Table 4. Biomphalaria glabrata CCE sequences used to construct a phylogenetic tree.
gene ID in phelogenetic tree	AA sequence	length (aa)	clade
Bg nlg4X	MGTGQTTHLRYLSGLLLRAALVLFLFAKGFAVVYHHRISDRVMTTRYGKVRGLEVTFPGNKLRPVEAYFGLRYGDLDGGGMRFMPPKNPKEQWNGIRVAMKHQPVCPQPVKHEQEYSKQLPEARVAHLRNITPYLTDQKEDCLTLNLFVPKQEWNDTAPMAVMVFVHGESYQTGTGNAYEGSVLASFGDVIVVTLNYRLGVLGFLSTGDQSAMGNYALLDVIQALLWLKENIPSFNGDPQRVTLFGHGTGAAIVNLLLLSPFVYDLRGNIFQRAIIQSGSASSTWAMSYDPKWCTEKLAIKVNCSRHIANTKDLVHCLRERSDVTLVNSTPNAPKYYSCFAPSIDSWTVLTHEVDKLLREPNSKFSTVPVMFGVTKNEAYAYLNQDDIRKGISEFRKAQ…	963	M
Bg nlg2-X2	MEISRSTRLVLVVFCQLTVWTRTTSVEGRRFVDRQTSYGTVRGFVDVIKGRQKVEKYLGVPYAKPPVENLRFEAPEPPDTWAGVRTAYELSPACPQPRLGVDYIQLHVPDFNHTSEDCLYLNIYVPRASRHSQRHADVQHHRPQYAVLVFIHGGSYQNGMGAMMDGSHLATREIIVITFNYRLGPLGFLETNDKSFPGNYGLLDQLEALRWIQKNIHNFGGDHDRVTIDGHSAGGCSVGLLMLMPMAKGLFSRVIQQSGSPFADWAVTRQPITPNFYFKIFTTAVGCYGNGTAEVKTCLKELPSDVIERVILEQPEHPVSLVPPFRPVVDGAVLPDTPEKLAATGEINGDEILTGTTTDEGLMAAVPLLNNYGVGRHGLQRLQAVISGFSVDLPAVRSL…	511	M
Bg ace	MAQWARGRKQMVARKETSQRTIERTVPKFISADHSVRSCELRFSYPEPPDAWTEVKDTTKPPNCCMQLPEDTTFMNFSGTAVWNPNTPVSEDCLYLNVWAPRTNPPYANKAVMVWVYGGSFSSGSSALDVYDGLYLAADNDVVVVSMQFRIGALGFLTFGSNEAPGNAGMMDLVMALQWVQTNIHSFGGNSHNVTLMGESSGAVSIGLLMLSSLSRELFHRAILQSGAPQVHWGTYTVTEGRRRAIKLAELLQCDTQTSDTEIIKCLRRKPAELFPFHELNITRGIAQFPFVPAIDGRFLRMSPAEYLREGSFKKAPVLLGSNANEGTWLLVYYEAQHFNIVTESLISRRQYDEVMSSIFQYYPQFPKELNHMAREAIRFKYIDWIDPEDQVRLRGQVE…	610	J

## Sheet: Bradybaena similaris
Supplementary Table 4. Bradybaena similaris CCEs
Gene ID in phelogenetic tree	Gene legnth (nucleotide)	Nucleotide sequence	AA sequence	AA length	Clade
c120939.graph c0	2415	CTCCCTTTAAATAAACTCGACACCACAAAAACAAGTCAGTTCAGTTTAACCAAACGTCACTAGTTAGATGTACGGTAGCCTCGCCGGGCCCTTGTGTACAAAACTGAACAAATAAACCGGATTAAATACTTGTTGCTTAGATTTCAGCCGTTCCGAATGTTGTCAAGAGCAGTAATCAGAACTTCTTTCCCCTTTAAACTTCGAGTAAGAAAAATGTAAAAGAAAGAGTGGCACACAAAACAACACAACAGAGGAGACCTGCAGCTCGGGGTATAAATACAGCCAGCTCCCCTAGTCTGTGCACCAGCGCCTTGCCCGCGACAAAGATACCGGTACTCGATTGTGGAACAGGTTCTCCAGTAACACTTCCCTGCAAGAAGACCAACTCGCTGGTCATTT…	MTTAHPAMGRAWLKGRAWLLGRAWLLGLAWLCLTCMLGTHAQTSRNYTTVTFSDGRQLRGEVTHTPGAASTSSVARFLGVQYGASPTGARRYSQPELEPSWSGVRDALSFGPRCVQSLSDWADQSENCLYLNIFSPSLNSSSPVMVWFHGGGWRVGSSSDDIFDGTSLASRGVVVVTVNYRLGPLGFLTTGDDVMPGNYGMLDQVLALRWVRDNIRSFGGDPNSVTIFGESAGAASCSLHVLSPLSRGLFHRAIMESGSSFNLWGTERPGSAAKLDNLTRQIGERVGCRYVTSESFLTCLRNVSARNLLEATLSVRAQLRIEIPLTPRVERRFGFLPDYPKRLLESGSFNRVDTLRGYNSGEYSYFINDPENDGLTREEFATSFERFFSKYPVQGHAHD…	595	M
c125344.graph c0	1895	ATTGTGCGTCAGTCTTACTGAGTTACTCTTTGGACAAACGTTATTACCGAGTCAGTGATTGTGCGTGTATGGTACTGCATTACTGTTTGGACAGATAGCAAAGTAGAAGACAAAAGTTGCCGGACTCCAGCGATGAACATGCTCGTGTCCCTCGGGCTGACACTGGCTGCAGCAGTGGTCTACTGTGCCGGGTCGAGTGCTGACCAGCGACCTGTGTCCGGCAGGGGCCAAGACAACATCGTTCGTACATCTCACGGGCTGGTGCAGGGCCGGAAAGAGATTGTCCAGGTCTACAAAGGTGGAGATAAAACGGTGGACGTGTTCTGGGGAATCCCCTACGCCAGGCCACCAATTGGGGATCGCAGGTTTAAACGTCCGGAGCCCGCTGACCCCTGGTCT…	MNMLVSLGLTLAAAVVYCAGSSADQRPVSGRGQDNIVRTSHGLVQGRKEIVQVYKGGDKTVDVFWGIPYARPPIGDRRFKRPEPADPWSGVFQATTPPNSCVQVLVDTVPLPNPTTPLSEDCLYLNVFKPRCPPGGGKMAILVWFYPGFLAFGSSTVELYDGARLAASECIVVVTLNYRLGAFGFLAVDERESPGNMGLGDAALAVAWVQQNAGSFGGDSRRITVSGNSAGAGMAAVFLQSPRTRNLVNNAVVQSGATLTKFFHQSKKSAREAGLELARRLNCFSDNTTAVVACLRQVDAGDLALHHLLLTITLRYNMLTITDGYYLTQDPLAALMSGDFKRCELLMGTAENDGIFGLSFALPQEYSLRRPDPPGNLTDQEFGRTLSAILQLVFTEKAV…	570	J
c107500.graph c0	2005	TGACGACAACCCTAGGACAAATAACGGGAATAAGGAAAGTTACTGGCGCCAGTAAAAAGATCGATGTGTTCTACAGCATTCCGTTTGCCAAGGCTCCAGTCGGTGAGCTGAGATTCAAACCTCCCCTACCAGCGGAACCATGGATGAGTGTCCGTGACGGCACGCAGAAGCCAGACTCCTGCTGGCAGTCTATAGACACCAACTTCGGGCGCTTTCCTGGCGTGGAGATGTGGAACCCCAACACACAGCGAAACGAAGACTGTCTATATTTGAATGTGTGGCGCCCTGTCTGTACACGGCATTGCTCTGAGCATAAACCGAAATCAATACTGGTCTGGATTTTTGGAGGCGGCTTTTACTCGGGAACAACAACGTTAGATCTTTATGATGCTACACAGC…	MSVRDGTQKPDSCWQSIDTNFGRFPGVEMWNPNTQRNEDCLYLNVWRPVCTRHCSEHKPKSILVWIFGGGFYSGTTTLDLYDATQLAALNDVIVVSIAYRLGPFGFLYLGNEEAPGNAGLMDQALGLKWVRDNAVNLGGSPESITIFGESAGAASVGFHLLSPLSRNYFNNAIMQSASPFADWAIHERDVAKNRTWSLIASASCSKNNISASINCLRSLDAQILCEKQWTINAGVTFPFAPVIDGHFIPDHPLKMTERGEVKNASILLGVNKNEGIYFNIYQFQQDFPLQGDGHISKDQFDRILPHYFSHNKSVSDFIRDEYAKSSNLSYALLLDAITGDKSFKCPVVNFAGLLIRTGNKVFTYSFEHRVSTNPWPSWSGVAHGYEIELIFGLPLSSSS…	506	J
c124793.graph c0	2744	GTGATTATAAGATGTTTATGAAAATGGAAATTCAGATGTAAATAAGAAACATGATTTTTGAATATGAGTTACAATATCTGGATTATGATTTGGCTAAAACAAGGTGTACTTGATTCCTCGACAAGGGTCAAAACATCTGTACACAAATTTTCATATCTGTGTTAAGCAATATAAAGCTGCCATTACATGAAATATGGCGTATCTGCTTCCGGTTCCTGTCAGTATTGTTACAAACAGTACATCTTGAAAAACAAGGAGAACTGAAACTGCGAGGCCATATTTGGAACCCTTTGGTGATGTTTTTACGGGCGTCCACCTCCGCAACTGCCCATCCTCCTCTGGTAACTGCTGAGGAAATTGTCAAACTGAGTCTTCCAGTCCACAATGTAGTGGGTCTTC…	MLAGDYVAKIVTLGHLVMLWYVIQVSGDGPIVDTDKGKVRGFTETINGKKVDIFYGIPFAAPPIGELRFRPPVQNEPWNGILDATQQPNSCFQGVDEHFGNFTGSNMWNPNTPVSEDCLYLNVWVPRTNPPYKDKAVIVWIYGGGFYSGSSTLDIYQAPYLAAENDIIVVSMQYRVGALGFLALNTPEAPGNAGIWDQRMSLEWVSRNIHHFGGSPYNVTLMGESAGAVSVGIFLLCDLCRGYFQRAILQSGAPQAKWGVLHKDEMIRRSENFAKIVGCDKDTTHDYLVKCLRSLDYTANIILKEGRSSSGIVQFPFVPIVDGVLLRQDPAQLLRSGNFKKTPLLLGSNENEGTFFMVYTSTVYNLKNPPAITNSLYKQLIENPMFYYYPHYPNILNDF…	622	J
c106892.graph c0	2042	CGGGCGGACATGTGTGTAGTGGAAGAATATAACGCGGGCGGACATGTGCGTAGTGGAAGAGTATAACGGGGGCGAACATGTGTGTAGCACTAAAATAGTCAGGGAGGACTGATCGCGGCAGATGTGTGGAAAATCAAGATGGGAGTCAGGCCATCCATTGCTCTGATTGTGTGGTTGCTAATCATTGGCCTGATAGTCTCAGAGGCTGCCAATGGCCTCCTGCAAACAACGTTGGGCTCAGTAGAGGGAACCGTTGTTCAACACAACGGAACTGGAGTCAGTGTCTACTACGGCATTCCGTACGCCAAGCCTCCAATTGGAGACTTACGATTCAAACCCCCTGAGCCAGCTGCGGCCTGGGCGTTAACCCTGAACGCCACCCGCCCACCAAACTCCTGC…	MGVRPSIALIVWLLIIGLIVSEAANGLLQTTLGSVEGTVVQHNGTGVSVYYGIPYAKPPIGDLRFKPPEPAAAWALTLNATRPPNSCWQLLDTSPNRPARVEMWNANTNLSENCLYLNMWIPETEGPKAIMVWIYGGGFWGGTSTLSLYNGLTLAARNNVIVVSFNYRVGPFGFLYCGTPDCPGNVGLLDQVLALKWVKDNAANIGGDPGKITIFGESAGGVSVGLHMMSPLSRDLFTYGMMMSSTPLAYWAIQSHESAVNRTKRLACFLNCSIHDTDSIVAYLRTVSPQLLTQAQWRLPSFYFDLTVAPVVDGAFLPKHPSELMAEGLVKNTSIITGAVKDEGTYWLFYGFKDIFRERDPNPVSPSQYATVVQGILAPLGDNFTSDSIRRLTMNEYFE…	598	J
c130355.graph c0	2613	GTAATGATCAGACAGAAAGAGGTATTGGAGAACGTATTACAACAGAACAGATCAGCGCTAGAAGCGACAGAGGCAGATCAAGAGAATGACGCAGGGTGCTGTCAGACAATGCCATGGTGAGATATCATTAAAAGAATTGAGCCAGAAGAAATAAGGCCAAAATGTTTTTGAGACTCGAACTCCTGAGCTACTTGGCAAGGCATGTGATTATGATGATAGTGATCCCTGCCTAGTGCTCATTTATTGATCGAATGATGATTTAATACGATGAGTGCTCTGCACTGTTTCTACAGATCTGTGTAATCGCTGTTCTTTTATCATTCTTGGGTAAACCAAGACAATGTTCATCTTTTAATGATAAATGTTCAAGGCAGCAAGGTCCTACTTTTCTCTACACTC…	MRDKSTRPSRVKISKMSCRVIGVITSAVVVVLGAGLSSLIWVLHSSSSVDAAASPPVVATPVGRFIGVLTSSETYGSSYVSYRSIPFAKPPLGALRFKRPQPLDDTKGDHIINSEQYKQSCWSVTRKSTDTTYGEDCLYLNIYVPGTGDAVQTERKLPVIVWIHGGGFVAGSTFPEPEKLVIRGDVIVATINYRLGVFGFLTTEDDVLPENNGLWDQYLAVKWLKDYIRFFGGDDQSITLFGESAGATSVALLALSPVSSGVFNKGILQSGGATGLISRDAKKRARDFASMVGCSSSQSSSDLAECLDQVSVADILQYSRPSAFNIPLAQQQSDFIWMPVIDGEFIPDEPLKLLHNITYLEKVRAFEKDFLFSLLNNEGGLISDNFLHRIPLTQMTNTS…	608	UNdetermined Clade (NC)
c125472.graph c0	2139	GATTCTTTCCCTGCGTGTAGTCAGCCATGTAATAGAGTAGGCGTTGGCTGAGTGATCCCTGTATTAATGCGACAGCAACACGCAAGAGCGAATGTGTTGGAGACACCTTACAGATGGCCTTCAGCGCAGAGACAGCAGTTTATATTGATGCTGATGATGTAGATGATGTTGCTTTTGTTGTTGATAATGGCGATGAAGGTGATGACGATGACGATGAGGGCGTAGAACGCCAATACTGTAATTTCTCGAATAAACAGGTCAGACATAAGATTGCATGTCCGGCTGGAGTTCCTGTGTTGAATTCAGAGACTCATATTCTTTCTTCCACTGAGGCACCAGCTTATCCCAAATGATGCTGCGGTCCCCATACAAGTTCTGATGGACTGATGGCTGTAGTGA…	MSLAVLCFTLLLGFTACSVHDVPEPVVTAPAGTFRGKILASPSGATFASYRGIPYALPPTGERRFALPEAFPKIEDGIYDASEFGPICLQHEDGVSVGQEDCLFLNVYTPLVGKDAEDEQRKVLVFIHGGGFVVGASNVYIPGELVAKGNVVVVTINYRLGWLGFLRGNPEFLPGNQAFHDQVLALKWVQENIAAFGGNLHDVTLAGESAGALSVSVLSISPLTRSLFNKAILMSGTAFSFPTPSQQSVDLLETVQTVVGCENEENVISCLQQQPAENFEMTFTSAILTKLVSSGDALLPKPIPELINDIEYLNNVGFFSRDYIVSITKHDGYIRVNSLFGILNITTIESSVEDIAKLLQLPDYVTELLVQEYLDLYEDVEKAVIALNTDYFYLQRSNY…	561	UNdetermined Clade (NC)
c131392.graph c0	2260	CCAGTCTCCAATCCCAGGCAAGAAACAACATTGTATCTCTTTCCTTTTTTCAGTTCAGATATTTGTATTAATCGCAAAAGTAGACTGCAAAATCACGAAATTTAGGCAATAATCAAATGCGAGATTCAGAGTGGGTATTTTACACATGCAAAGGTGTGCAAAAAACGCTGCACGTCCTTGATTAAATCAACATACTATAAAAACTCCACATTTAAACTCTTACGGCAGCGTTCAGTTGGAGTTGATTTATGCCCTTTGTGTGTTATGTCTATTTTACATTTGCTAAATGTCAGATGTCATAAACCTCCATGGGTTGTTACAGCTTACATGTCCACGGCTAATGCCAGCATGTTAGCTAACCACTACTTGTTTTAAGAATATGCTGAACACTTTACAGCT…	MQRHHRLSSVLLAVALCYASARTSDPEVHTPAGRFRGKILTSHSGHEYASYRGIPYALAPTGDRRFALPVRHPVIEGVHDATEFGPVCLQHSDGVAIGKEDCLFLNVFTPLKATESEDVDLKTVFVFIHGGGLVVGASDPYLPGDLVTRGDIIVVTMNYRLNWFGFLRGNSGYLPGNQGHWDQLLSLQWIRDNIRAFGGDPDDVTISGQSAGSMSASLLSVSPLAKGLFTKAILLSGTIELLPSAPHATNDFLQTAANKFGCGDGSVNGNEEAVVKCLKQLPGEVFVKELAFESLIGSTSFGDDLLPKSFTEILKDTDYLSEIGFYNRDYIVSVTEDDGYIFISARFVGVIDTTSQTECLQGLKPWLRLPLSVSELVLEEYKKIYGDLKKATTALITDV…	561	UNdetermined Clade (NC)
c129509.graph c0	2360	GTTTCTAGTCGGCATTTTGGTGATTCTACCAGCTCTTGTGTTGTCGGCTCCCGAGATTCGGCTTCCAACCGGACGGGTGCAAGGCACGGACAAGCTAGCTCAAGCCTCACAGAAGCCTTACGTCGCATTCTATGGCATCCCCTTCGCCGAGCCTCCAGTCAACGAGCTGAGATTTAAACCGCCTCAGCTATTTGTTGGCACCGGACCTGATGTTGTCATTTCTTCCGACAATTTCAGGCCAGCGTGTCTACAGAATGTACCAGCAGGAGCAAAGAACCTGAGTGAGGACTGCCTGTACATCAACGTATTTACTCCCCCTGACGTGAGCACGCCCAAGAAGGTGATGTTCTGGATCCACGGTGGCGCATTTATATCAGGGGACGCGACACAGTACGTGCC…	MPKMSFLVGILVILPALVLSAPEIRLPTGRVQGTDKLAQASQKPYVAFYGIPFAEPPVNELRFKPPQLFVGTGPDVVISSDNFRPACLQNVPAGAKNLSEDCLYINVFTPPDVSTPKKVMFWIHGGAFISGDATQYVPSQLVTDKDVIVVTIQYRLGLFGFLTSQDGDANNGLRDQILALKWTKDNIQAFGGDPNDITIFGESAGAASVSFLCLSPLTKGLFTKAILQSGTALSGWAINRNPLDLLNSLAEKLGCTASLFYLRWFRRIRSSDLMNCIRNKTAAQLQAVNIQSSAIADMSTTNAQFLPAIDGDVIPLSPESLLANTTYLRINGVLDRDYMVGVTNNEGLILAPQFPTQDLIYNFTAAEMAEGFIRIISNLLSPTSPIDPCKLQLLNYQYS…	582	UNdetermined Clade (NC)
c124059.graph c0	1825	ACAGCAGAAGAGGCCAACAGAAAATGCAAATTCTGCACACTCACTCTCCTCTTGACGGCATCAAGAGAACGAGACAGGGGAGACGACAAAGAAGTCGGGACCATCACGATGGACACAGGAAGCATCGTGAAGAACACATGTGACCGTCTGCTAGTAGAAGATACAAGAACATATGGACCCCTAGTGACAGGAATAAGCGCGTTTGAAATGAAGTATGCATTCAGATAGAAGAGGTGCATGACGGGACGATGCCGGCAGACTGACAACAAGCGAGTAGATGGAACGAGCGACATTTACACCATTGGACATTTGCAGATAAATACAATCAATTAAGGTTTTGTCCAAAGTGTAAGAATGTCCATTCGGCATTTGCTAATTGGGATAATCGTCTATTGTCTT…	MQSGTVLSGWALNRNPSLILNSVAEKLGCTSRLRQADSSETIDCIRNKTVSELLSVDTQGTSLIDRLNTNNQFLPTVDGDLLPKSPESLLANSTYLRINGVLDRDYILGFTNNEGLIIFSTLLDPAAIDSLTLPAAAEEFIREASSLASPTAIDPSKLELLYYQYSYPRDSDGHTSIQNLLDMATDVMFAIATVRFARALTTASNSTNVYLYLFDHYPQLINPDGPLKGSTHGLDLCYEFDIGEIVQLSRFYALPPQPSEKNLTELLLTTLSQFAKTGSPQGPSGQEPRDWLPYDHEDEHFFRISLRPRPDEHVFAKRVALWTDLVLKSSSKVPSLLRALGIH	343	UNdetermined Clade (NC)
c130742.graph c0	2175	CTAGGTTCCACAGTAAAAGTTATCTGGTCGGCTGACTGTGTAGTTAAACTACCCGGTCTATACGAGGACATTTTTTACATTCTCGCCGAGCATACGAGCAGTGTTTTATCCATACCGACAACCAGGAGAGAAGCCACTAGCAATGATTCTCAAGTTCGTATTTTCCTGCCATTTGCTGTTGATTCTTGTGTCATCTGCTTCGGCCTCAGACCCAATTGTCAGAAGCCCTGCAGGAACTTTCCTCGGCTCCACACTAACTGCCTTTAATGGCCAGATCTACAACGCTTTTCGTGGGATTCCTTTTGCCAAACCTCCAGTCAGAGATCTGAGATTTCAACCTCCTATTCCCGTAGATCATATTGATGGATTGTATGATGCTACAGACTTCAAACCCCACTG…	MILKFVFSCHLLLILVSSASASDPIVRSPAGTFLGSTLTAFNGQIYNAFRGIPFAKPPVRDLRFQPPIPVDHIDGLYDATDFKPHCVQLNIIPNSFSLGQEDCLYLNVFTPRCSDRNDGHLKKVFVFFHGGGNLNGFTHIYLPGTLVTEQDIVVVTVAYRLGYLGLLSTLTPSCEGNLHLKDQLLALAWVQENILDFGGDPAEVTIGGESAGGFDTGFLTLLPGSRDLFARAYCQSGTPGTKNTLMITNPRPEAIKVGRRLGCLRDEQPDPVADSEFEKMVDCLKQVPAEQFAANGTADIPDLQTLLSDDIFPKNIEEVFSDQNYLKSINFFDRNYLVGVNENEGDIFSIINKQTLSALPEEVARSLTPEVMYYKTIEMFLAPVFGPVSQQVIHKVAEY…	576	UNdetermined Clade (NC)
c128335.graph c1	1932	GGGATGACATTTGCTTTGTTTCAGAGTCATATCCATACACCCAACTTTTATCACCAGTGATTATTTATGACATGAAATTTACATTTACATCATTTTTTGTTTGCTCACGAAGGTCAGTGCAAATGGGCAACCGCTTTTCTTTCTGGTCCTCAGTCAGGAGGCAGAACACAAGTTTCACTGTCACCCATCTCATGTGCAAATGTTCATGTATAATTTTATGGGAAATACCTATATTCTAATGTGTTTGGCAACCTCTCTGAGAGTCATATGTCTGTCCATGTTTCTTGCACACGTGAATGGGAATGCCACTCAAATGTTCTAGATCTACTTAGACCAGACTCTCTGAAAGCAGGCTGCAACATTTCAAAAGTTTCAAAAATCAGTTTTTCTAAGATGAAA…	MSTSLLTLVPQSRGLFARAYCQSGATGTLNTILITDPRPEAIKLGRRLGCLQNDQVDPAKEEEFEQMVSCLKKKPAINFYLNGTSSEVPFAHPVLNGDLFPKNIKELFSDEDYLKSINFLDRDYLMGLDDNEGDIINLLNDQILSTLPEELRKTLTPQILLHSTIQTFLAPVFGPVSAKVIQRVAEYYENNFQRDPIADFGGDVLFHMPVLQYSAGAAAGRSSENSKVYLFRFVHFPEWLLAPHRGMLHLFDLLYLFDVDMETLSKMLPVKIDRRKWSEQDDKMRVQFITMIGDFIKTGNPGHSLKTCLPSGWPAYDADRQQYLEIDLTPEVKHHLFPERVKLWSEQIPEWIREFPYDNNKHDEM	365	UNdetermined Clade (NC)
c123460.graph c0	1705	CTACAGTGTCATTACTACATGGAAACTGTTTCCGGCCTAATAAAAATAAAATAAGGAGGCCGCATTGTTCCCGCACGTTTATTTCAAGATATATGTATCACCAGTTCTCTCTGCTTGTATAATTGTGGGCGAAATTTATTTATGACAGAAGCCTCGTCAAGTCTTAACAATCGTGGGTTTCTGTTGGTGTAGGTTGTAGGTAATTCTAACTTAGAATTGCTCTGTAACACTCAAGTTCTTTCTTAGTTGTGAAATGGTCTGTGACTCACACCCTTAACTTTAAACAGGAAAGATGTGTGACAGCATATGTTTGCTTTAATCTGTGTAATGTCTTGTGCATTTTACCAGTCATGATGTTTGCCTTTCTCTGCATTGCTGAAGCCAGTCTCCTTCACACTT…	MAGQEPWAPFEGKYKIHEETKAFWRLLSASRPTPFSELGVEKSKELALAQFQALSGEIDFEGEDTEIIVPSPYTPEGIPVSVYKPASRPEVPAILIYFHGGGLVICNRKTHETAAKIIARDSGAIVLNVEYRLMPNPDAPYASFDDAEVVTKWVLENKGVVGGKPNSKVGVGGDSSGGHLAIAVTNEVPGLDHQILIYPFADTSLSQDTVKEFKQFPGLDENDVKFFIQYGYSQIPDLVTNPRFNGMARTNTASSPPALIILAEFDPLRGCGIEYAEKLRAAGVKVQLEVIEGVLHGFLLYIKCFRTTSGQAFDLIAKFVKQFQ	324	N
