# Supplementary material for: Sequencing of Transcriptome and Small RNA Revealed the Xenobiotic Metabolism-Related Genes and Potential Regulatory miRNA in Asian Tramp Snail
Source: Front Genet. 2021 Jan 13;11:595166. doi: 10.3389/fgene.2020.595166 (PMC7838618; doi:10.3389/fgene.2020.595166)
Supplement: Supplementary file 6 [file Table_7.xlsx]

## Sheet: Insects
Supplementary Table 7. Sequences of gene associated with core machinery RNAi pathway used for phylogenetic tree construction
gene ID in phelogenetic tree	amino acid sequence	AA legnth	RNAi pathway	insect species
A. mellifera AGO1	MFSCPRRPNIGREGRPIVLRANHFQITMPRGYVHHYDINIQPDKCPRKVNREIIETMVHAYTKIFGTLKPVFDGRNNLYTRDPLPIGTDKIELEVTLPGEGKDRVFRVVIKWLAQVSLFALEEALEGRTRQIPYDAILALDVVMRHLPSMTYTPVGRSFFSTPDGYYHPLGGGREVWFGFHQSVRPSQWKMMLNIDVSATAFYKAQPVIEFMCEVLDIRDIGDQKRPLTDSQRVKFTKEIKGLKIEITHCGTMRRKYRVCNVTRKPAQMQSFPLQLENGQTVECTVAKYFLDKYKMKLRHPYLPCLQVGQEHKHTYLPLEVCNIVAGQRCIKKLTDMQTSTMIKATARSAPDREREINNLVRRADFNNDSYVQEFGLTISNNMMEVRGRVLPPPKLQYG…	838	miRNA	Apis mellifera
T. castaneum AGO1	VFQCPRRPNLGREGRPIGLKANHFQVTMPRGFVHHYDVSIQPDKCPRKVNREIIETMVHAYGKIFGNLKPVFDGRNNLYTRDPLPIGNSREELEVTLPGEGKDRLFRVTIKWVAQVSLYGLEEALEGRTRQIPYEAILALDVVMRHLPSMSYTPVGRSFFSSPEGYYHPLGGGREVWFGFHQSVRPSQWKMMLNIDVSATAFYKAQPVIEFMCEVLDIRDINEQRKPLTDSQRVKFTKEIKGLKIEITHCGTMRRKYRVCNVTRRPAQMQSFPLQLDNGQTVECTVAKYFLDKYKMKLRYPHLPCLQVGQEHKHTYLPLEVCNIVAGQRCIKKLTDMQTSTMIKATARSAPDREREINNLVRRADFNNDPYVQEFGLTISNNMMEVRGRVLPPPKLQYG…	842	miRNA	Tribolium castaneum
D. melanogaster AGO1	VFTCPRRPNLGREGRPIVLRANHFQVTMPRGYVHHYDINIQPDKCPRKVNREIIETMVHAYSKIFGVLKPVFDGRNNLYTRDPLPIGNERLELEVTLPGEGKDRIFRVTIKWQAQVSLFNLEEALEGRTRQIPYDAILALDVVMRHLPSMTYTPVGRSFFSSPEGYYHPLGGGREVWFGFHQSVRPSQWKMMLNIDVSATAFYKAQPVIDFMCEVLDIRDINEQRKPLTDSQRVKFTKEIKGLKIEITHCGQMRRKYRVCNVTRRPAQMQSFPLQLENGQTVECTVAKYFLDKYRMKLRYPHLPCLQVGQEHKHTYLPLEVCNIVAGQRCIKKLTDMQTSTMIKATARSAPDREREINNLVKRADFNNDSYVQEFGLTISNSMMEVRGRVLPPPKLQYG…	853	miRNA	Drosophila melanogaster
B. mori AGO1	MYPVGQPPAGETSGGAVGVAGAVGAPAGTPGAAPVAPSAAPVGAPAPGVAGGAAGLPLVSPAAAAPPDLPVLTCPRRPNLGHEGRPIMLRANHFQISMPRGFVHHYDVNIQPDKCPRKVNREIVETMVHCYNKIFGALKPVFDGRNNLYTRDPLPIGNDRMELEVILPGEGKDRVFRVTIKWVAQVSLFALEEALEGRTRQIPYDAILALDVVMRHLPSMMYTPVGRSFFSSPEGYYHPLGGGREVWFGFHQSVRPSQWKMMLNIDVSATAFYKAQPVIEFMCEVLDIRDINDQRKPLTDSQRVKFTKEIKGLKIEITHCGTMKRKYRVCNVTRRPAQMQSFPLQLENGQTVECTVAKYFLDKYKMKLRYPHLPCLQVGQEHKHTYLPLEVCNIVPGQR…	912	miRNA	Bombyx mori
A. mellifera Dicer1	DIPKCNFVMRYDFPKTYQSYVQCKSRARAPDALYVLLVSQEMSKEYVWQLAQYHYIEKTLLVKCSNNEPSEEEENEADMYAAMIPHYKPLDGGDAPKVTFNSAISLVNRYCAKLPSDTFTRLTPEWSIQEMNIDNILMYICSLRLPINSPVKYIVSSYPMPNKAMARRMAALQLCIDLHRKNEIDDNLLPIGKENFKAKPEDAEVPALPDESKVDFSEARPGTTKRRQYYYKKTAEALTDCRPIIGVPSYLYHINLVLSCPLPEEQNTRGRRIYPPEESAIGFGIITLKEIPKLCPFPIYTRSGEVHVKLKLTKQTIILNEMQVEKIATFLNYTFTNVLRLQQYLMLFDPNASENSYMIVPVKLDEQSDIAVDWNFLECIYKNRNIGPTKIPEEARKNF…	1426	miRNA	Apis mellifera
T. castaneum Dicer1	DLPKCNLVIRFDLPQSFHSYIHSKARARANEAHFLLLANENEVSDFVENLAEYNEVENTLLKRCYSLEPDKNEELVADASSLQCRPYQPSAEPGANSVSLSNAIALVNRYCAKLPSDTFTRLTPIWHEEKVENGYICSIRLPINSPVKKTVTSPPMINTLLARRAAAFMICQLLHKAGELDDNLQPIGKENFKVNEEDWNSSALEESDEENLDPRPGTTKRRQYYYKKVADALLDCHPIIGQPTYFYKIVMKLTCPLPEEQNTRGRKIYPPEDSPQGFGILTSKEIPKISAFPIFTRSGEVSVDLQLCSQLIVTENQICKIREFLNYTFTSVLRLQKYLTLFNPDASANSYLIVPTIDGATTTVDWDFIDLIYANLTVLPEIIPEEVRKSYEFDPEKYR…	1362	miRNA	Tribolium castaneum
D. melanogaster Dicer1	DVPKCNLVVRWDPPTTYRSYVQCKGRARAAPAYHVILVAPSYKSPTVGSVQLTDRSHRYICATGDTTEADSDSDDSAMPNSSGSDPYTFGTARGTVKILNPEVFSKQPPTACDIKLQEIQDELPAAAQLDTSNSSDEAVSMSNTSPSESSTEQKSRRFQCELSSLTEPEDTSDTTAEIDTAHSLASTTKDLVHQMAQYREIEQMLLSKCANTEPPEQEQSEAERFSACLAAYRPKPHLLTGASVDLGSAIALVNKYCARLPSDTFTKLTALWRCTRNERAGVTLFQYTLRLPINSPLKHDIVGLPMPTQTLARRLAALQACVELHRIGELDDQLQPIGKEGFRALEPDWECFELEPEDEQIVQLSDEPRPGTTKRRQYYYKRIASEFCDCRPVAGAPCY…	1673	miRNA	Drosophila melanogaster
T. castaneum aubergine	MEARGKGRGYGRARGQAAGQQQQQQQRPGGRPGGDQGQPAPRGLPQSAWVRPAQPAGSAWPRPQMGSAPQQQKPQVAGRGERQEFDQGAVPRRVIAGEGDQGNQEGSQGAARGGGASSVRGRVVRKEILYTRPQNLKSKKGTIGTPINLIANYLPLIKQGKWCLYQYRVDMAPDVDNTNKRKELVRVAVKDLLKGGYLFDGTVLYTTQRINNDSVDLFVDNSGENVRITIRLVGDLAWGDMHYIQLFNIIIRKCLKLMGLQQVGRNYFMPDNKIVISEHKIQLWPGYFTSMRQHEKDILLNVDLQFKFMRTDTVYDNLLECQGANARKEFQSKIIGSVVLTHYNNKTYKIDDVDFNSTPAHTFKLKDGSETTFKDYFKKKYNVDIRVKDQPMLISRSKP…	889	piRNA	Tribolium castaneum
B. mori aubergine	MSEPRGRGRARGRAGRGGDGGGPAPRRPGEQAGPSQQSMPPGPRPQPPSGWGPQSSVPPVRAGVPTPTAQAGRASHRVTPTTHEHPGDIDVQQRMQKLELGPHSSGGGDASSVVGRGSRRGGGRVLPETISILRTRPEAVTSKKGTSGTPLDLLANYFTVETTPKWGLYQYHVDISPEEDSTGVRKALMRVHSKTLGGYLFDGTVLYTVNRLHPDPMELYSDRKTDNERMRILIKLTCEVSPGDYHYIQIFNIIIRKCFNLLKLQLMGRDYFDPEAKIDIPEFKLQIWPGYKTTINQYEDRLLLVTEIAHKVLRMDTVLQMLSEYAATKGNNYKKIFLEDVVGKIVMTDYNKRTYRVDDVAWNVSPKSTFKMRDENITYIEYYYKKYNLRIQDPGQPLL…	899	piRNA	Bombyx mori
A. mellifera aubergine	MSAGRATQRLGPKGDGGPGHKEESIPEAMEVSGETSGGDAAALSSQLGRGAMRGRRMIPSTPENIQTRPENLITKQGSTGSNVMLQANYFKLLATTDWCLYQYRVDFAPEEDRTAVRKGLLKLHREILGAYVFDGTVMYSSRRLQDKMEIWSRRTSDEHKIRITIRLVGEMEKVDQRYLQFFNIIMRKCLALLNLQLVGRDYFDAHSKVEVRDFRLELWPGYLTSIRQHEKSILMCAEIIHKVMRQQTLLDILNDCYKQDKLDYETSFENQVIGLVVLTDYNNNTYCISDVDFDSSPDSTFQLRTGEKISYREYYRNKYQISITNASQPMLVTRLKPRERRAGQAELVYLVPELCRATGLTDAIRDNFHLMRTLAEYTRVSPAARIDKLMVFNRRLRGN…	827	piRNA	Apis mellifera
D. melanogaster aubergine	MNLPPNPVIARGRGRGRKPNNVEANRGFAPSLGQKSDPSHSEGNQASGGNGGGGDAQVGPSIEKSSLSAVQMHKSEGDPRGSVRGRRLITDLVYSRPPGMTSKKGVVGTHITVQANYFKVLKRPNWTIYQYRVDFTPDVEATRLRRSFLYEHKGILGGYIFDGTNMFCINQFKAVQDSPYVLELVTKSRAGENIEIKIKAVGSVQSTDAEQFQVLNLILRRAMEGLDLKLVSRYYYDPQAKINLENFRMQLWPGYQTSIRQHENDILLCSEICHKVMRTETLYNILSDAIRDSDDYQSTFKRAVMGMVILTDYNNKTYRIDDVDFQSTPLCKFKTNDGEISYVDYYKKRYNIIIRDLKQPLVMSRPTDKNIRGGNDQAIMIIPELARATGMTDAMRADF…	866	piRNA	Drosophila melanogaster
A. mellifera AGO3	MEADKQFGKGRGSILLKLLKEKEKVENEEILQGISSTLNASNNAKESKNQTEFNLQSVIEIPSSSTIGRGRASLLQILKEMKSSETLQSKPIQTISSGRGSLLSRLKATSLNETSLQQPNIAKNSSDDAGVVGKLSDITIQENKPKSEASCKPMSHQGTEGEPIQLGANYINLKLDPAKGLFNYEVKFNPDIDSRPLRRKLLNQHVQALGRTKVFDGVTLYLPQKLKQDINLFTSIHPMDESKVELKVIYKKQQSISENIPFFNVLLGRVMRALSLVRIGQHSFNPKGIHCVPQHKLEVWPGYVTAINEYDGGLKLCIDARHRVMRTETVRDIMMKFGGKPNFKDIIIRELIGLSVFTRYNNKTYRIDDIAWDKNPTYEFDKGTDKISLINYYKLHWNL…	912	piRNA	Apis mellifera
D. melanogaster AGO3	MSGRGNLLSLFNKNAGNMGKSISSKDHEIDSGLDFNNSESSGERLLSSHNIETDLITTLQHVNISVGRGRARLIDTLKTDDHTSNQFITSESKENITKKTKGPESEAIASENGLFFPDLIYGSKGSSVNIYCNYLKLTTDESKGVFNYEVRFFPPIDSVHLRIKYLNDHKDKLGGTKTFDGNTLYLPILLPNKMTVFISKAEDVELQIRILYKKKEEMRNCTQLYNILFDRVMKVLNYVKFDRKQFDPSRPKIIPLAKLEVWPGYVTAVDEYKGGLMLCCDVSHRILCQKTVLEMLVDLYQQNVEHYQESARKMLVGNIVLTRYNNRTYKINDICFDQNPTCQFEIKTGCTSYVEYYKQYHNINIKDVNQPLIYSIKKSRGIPAERENLQFCLIPELCY…	866	piRNA	Drosophila melanogaster
T. castaneum AGO3	MEQKPAPKGRGALLEMLKKHKEARAGGAGEPVEEQAPPKTRGRAMLLQKIQEAKERKAGGDSGQLSTPGPSTVPSETRRGVSGVTKALGEVAITASETCSYRGESGTPIKATANYILLNVEKDRGVFEYEVRFQPDIDAKSNRIKLVNQALGELSTTKVYDGDVCLYLPCLAFSPRQEFESVIPNTETPVTTTLIYKRKRKLSECLHLYNVLFKRIMHILLYQRMGRNYFSPDHKYLVPQHKLEVLPGFCVHVDEMEGGLMVCLDTQHRVIRSQTVYELFHEIRATNPRNFREEVTKNVIGACVLTKYNNRTYIIDDIAWNMNPKDTFEDRSKGPSCFIDYYREHYNIRIEDVDQPLLITRQVKQSPDGKIERMICLIPELCYLTGLTDAMRNDFKVMK…	853	piRNA	Tribolium castaneum
B. mori AGO3	MADPGKGRGRSLALLQALKKSQMMDSPSQSESQSPESTPEQSTAPSTIASATPSTSGVSIGGRGRAAALMLAKMQQKPGSTTPAIFVPPSSTSAPTAGTGRGFKLLQSLQASQKASSQVASSQVTSSAQSDIKDLTEKMSETSVSAQTSSVAKNKYFREVKDTPPVVKKGETGVPIEVTCNYIYLNFKENIVFEYEVKFEPDQDYKHLRFKLLNEHIEHFKEKTFDGTTLYVPHELPDAVRNLVSTNPYDQSKVNVSIIFRRTRRLSEMIHIYNVMFKCIMKDLKLIRFGRQHYNEHAAIQIPQHKLEVWPGYVTAVDEYEGGLMLTLDSTHRVLRTQTVLSLIKEVVQTEGANWKRKMTDILIGASVMTTYNKKLFRVDTIDDKMSPRSTFEKTEKGE…	926	piRNA	Bombyx mori
A. mellifera AGO2	MARKGKKKQNVQNHPHSSISQQQSNPDQQQNPSGSQQVHSQQQQSDISQKHACPKQQSDSPQQQGQTYDQQQQHSSSQQSHSQKQQSNSPQQQAWKLNQQQQQSSPQQPHSQRQQLDSPQQQAWRLNQQQQQSSPQQPHSQRQQSNSPQQQVRRPNQQQQYSSPQQSHSQRQQSNSPQQQAWKLNQQQQQSSPQQPHSQRQQSNSPQQQAWRLNQQQQQSSPQQPHSQRQQLNSPQQQAWRLNQQQQQQSSPQQPHSQRQQSNSPQQQVRRPNQQQQYSSPQQSHSQRQQSNSPQQQAWKPNQQQQQSSPQQPHCQRQQSNSPQQQVWRPNQQQQQHNSPQQETAVVLKKNDSLTQNMQDMYLDQIPKRTNQINKIDRNIIVETNMLKLIFTQNFQTNI…	1186	siRNA	Apis mellifera
T. castaneum AGO2	MGKKKGKGKAQEGSGEPSQPAPGASAPSTSQPPPQQQQQRQRGGPQGEGPGPRQQHPQQRPQQQRQQQQPQPHPQQQWQQQPQPHPQQQWQQQQPQPHPQQRQQQQPQQQWQQQQPQPHPQQWHQQPQPHPQQQWQQQQPQPHPQQRQQQQPQQQWQQQQPQPHPQQWHQQQPQQQRGPRQQQGRPRQQFPPGIQQQRSPSPQQQYGAPPPHWGPPGIVPQQPMGQQVQGPPPQQPPRGPPPGMGAPQQQQPQRGPLPQQQQQQQQRRPQQQQPPVKSPVPHPEPSSPPRQEPAPPLSGGGDCLSGALVVTPGTKGRRIQIESNHLSLNLGKLTEAYHYDVAITPDTPKCLLRDVMNLFGRKHYPQNHPAFDGRKNLYSPKKLPFPNDTKSDTIEVEGE…	1122	siRNA	Tribolium castaneum
D. melanogaster AGO2	MHFPITTPENKKGGQDSAAAPQPQQQQKQQQQRQQQPQQLQQPQQLQQPQQLQQPQQQQQQQPHQQQQQSSRQQPSTSSGGSRASGFQQGGQQQKSQDAEGWTAQKKQGKQQVQGWTKQGQQGGHQQGRQGQDGGYQQRPPGQQQGGHQQGRQGQEGGYQQRPPGQQQGGHQQGRQGQEGGYQQRPSGQQQGGHQQGRQGQEGGYQQRPPGQQQGGHQQGRQGQEGGYQQRPSGQQQGGHQQGRQGQEGGYQQRPPGQQQGGHQQGRQGQEGGYQQRPPGQQQGGHEQGRQGQEGGYQQRPSGQQQGGHQQGRQGQEGGYQQRPSGQQQGGHQQGRQGQEGGYQQRPSGQQQGGHQQGRQGQEGGYQQRPPGQQPNQTQSQGQYQSRGPPQQQQAAPLP…	1217	siRNA	Drosophila melanogaster
B. mori AGO2	MARGKNKGGKKEAPDSTKTPSSESQPSESQPSTSQIPTTEPTTTIEDDLGGLGLGESRKRRPRKKPTEKQESLAQAELSNPKLTQTDNPKAEVPKTEAPKTEALKPEAPIPEACKSEAPKSEESKIETRGSKPEAAADKPQDDDDGLGLGLGGGGRKKTRSRKPKFTAVETDIKYSKAPSSEPAIPGPSQSKPITSTASQPIQYVQNKPEVKAAPAAPVLYKIPDKILSPPSRTVPILTNYLAMKITKPLKIYRYDVTFKPDKPKKFIAQVFKLVKSKEFPKEILAFDQTKNCYSLTPLPKITTERYGVKVVIKDMNGKDMPFEVSFKASGIVDYNNVLKHMATGGSSLNAPTDTIQCIDIVLKQGTLESYVKAGRQYFMRPASPIDLGDGLEMWTGLF…	1038	siRNA	Bombyx mori
A. mellifera Dicer 2	MENNVNEFIPRTYQIELFEIACKQNVIIYLPTGAGKTFIAVMLIKELSADIRKSYDEGGKHTVFIVNTVPLVMQQSEYITRLTGLSCAALSGDIGIDVWTNKEWNAQLKEHKVLVMTSQILIDALCHGYIFLNRINLIIFDECHRAVNDHPMRQIMQYFENYSKEDQPKVLGLSATLLNSNVKLEKIHSVIESLEITFHAKVVTAITSVYTNPNEKIIEFDQYIIDNVGKQINNIIQETVRILNYVILRDNFKYNESSVIFRPIYKKLLSILNNIKEQLSNTGIYGASKCLLLHLIQLECLKKNIEDVETIIIMEYIITEITKCRKLLENKMKNNTEIEKIYNYSSDQVRTLFKILKDHHNNKTKDQQFCCIIFVKRRYTAKLLYQILKNISMNNEEYR…	1601	siRNA	Apis mellifera
T. castaneum Dicer 2	MDEEDELKPRNYQVNLMEIAIRENTIIYLPTGSGKTFIAIMVLKQLCAPILRPYSDGGKISVILVNSVALVDQHGKYVRDHATFSVGTYTGEMNVDFWSEAEWEQQFNKYQVVIMTSQIMVNLINNRFIDLGKVNLMIFDECHHGVEDQPMRQIMKHFHSCTDKPRVLGLTATLLNGNCKLSKVMDEIRSLEVTFHSKVATVEGLDVVVGYSTNPQELFKVCQPGALSLDAKQVLNNLRQLINDLEHINIKDEQNSVNLLQSETLKPLEPSDVLKSLRNLISDLMIHIEMLGAFGGHIACVAHMIQIERIKKHCQNHQLFIVLNYVMTIMGTTKLLLEETMAGYEPLEKIRKFSSDKVLKVFEILDEYKTKSDEELCCLVFTKRRFTAKVLHHIIDKAS…	1623	siRNA	Tribolium castaneum
B. mori Dicer 2	MTTTEGIQYHEQKARPYQAILEEIASSKNTIIHLPTGSGKTFIAQRLIKKFRNQLKKPWGEGGKRSFFLVNTVPLVNQQKNVIEMMCPVDGVGAYSSEDGVDYWKKADWDSELARNQVIVMTSQILSDMLTHAYIRIEDINLIIFDECHHAVEDHPMRVIMKHFLNCKAHEQPRVLGLTATLLNGNVSISKIEETLKQLENTFHATIATVDDLGEVMTYSTNPQEFIQYFRKPQMSEAAKEAISLLNTLQNLVMSVKLPVSLPSKDFKKTPCQRDISNDPNKIVKAVKNLIVGMITNLEEMGLYGGSLGILAYIVLLERLKRKASTKEENLLYSTVITHSTEARMILLDAMENETGYDKIIKHSSEKILQLIDLLKEYNPLILEKPGELLKVNHSRKPL…	1677	siRNA	Bombyx mori
A. mellifera R2D2	MSKTPVSILQEMMVKNKITPNYELIHDGGGSHMNVFAYQVKCDDLIASGIGRSKKDAKHEAAKAMLETIATKRGYLQLPASPAQSPIRTPLLPIIPEISRIPPDIPFVNAVGALQDLCVENNLQDPKYQQISDVGPPHAKIFTIECEVATLKEIGVAKTKKQAKQEAAKKMLDKLTDLVPDLNDNNIFDKKKQNIDQEMENSNKIAKAQYTKLSKLPTAKKINLGIKLSEYHIQFKSQYDDETRKEIIERILSIIPSNQSHVSEECIEYLIKKFEDILIDIGLDFTSLCIPSSENIIIAMRINTSPSIVELALGETESETKLRALQKMIDTIVVFLT	337	siRNA	Apis mellifera
T. castaneum R2D2	MSRQNTKTPAMVLQEFTMKRGFSPPEYILVMSKTGTHENEFHYKVNVANVCGLGFGRSKQVAKHNAASKALEILAEQGLYDPSSNPVQEFNAQSHRNESDSPQKPPVNFIGNLKDMCCEFKLPYPEFKEISDVGPPHCREFTYECCIASITTQATANTKKQAKQLAAREMLEKIRETCPQLAEQFAAESNSILADSHEVIKKYSELSTTLDVMPNRAVLIEDYSTAIKRRMEDKNVCFEDFQKQYKLKDKEGLDYIFEKLDIRYQIDLFQESPPVYCALFGLDTPFTVMAVGSSQENAMANLVFEIYRLLEIYMTKGAKG	320	siRNA	Tribolium castaneum
D. melanogaster R2D2	MDNKSAVSALQEFCARTQINLPTYSFIPGEDGGYVCKVELLEIEALGNGRSKRDAKHLAASNILRKIQLLPGIHGLMKDSTVGDLDEELTNLNRDMVKELRDYCVRREMPLPCIEVVQQSGTPSAPEFVACCSVASIVRYGKSDKKKDARQRAAIEMLALISSNSDNLRPDQMQVASTSKLKVVDMEESMEELEASRRKKFTTYWELKEAGSVDHTGMRLCDRHNYFKNFYPTLKKEAIEAINSDEYESSKDKAMDVMSSLKITPKISEVESSSLVPLLSVELNCAFDVVLMAKETDIYDHIIDYFRTMLI	311	siRNA	Drosophila melanogaster
B. mori R2D2	MKTPITVLQEMMMKLGQIPEYECVAQSGPQHQATFEFRCKALGESVSASARSKREAKQEAARAMLLCLSTIGHRVPPPFATEFTQPSHSNQSAGECSEGKAPTVDSRSYVALLKELCEEYKLPGVEYALVADTGPAHMRLFSVRASIGLHSRDASGTTKRQARQKAAADLYLFLRNLSRLTHDFVEEQALVRAHERAMERLVETTPAPWKPDLGQRVSEYHYGLISHTGECTARSRRRLPVVLDQCLRRAMVDTDPEKRMAARAVLSETDDIEEAAERAAAALELQTCWETLDPLHVLKLDAAPALAFSGHSRADAARAALRYLRRALRDVSPPPPAAL	339	siRNA	Bombyx mori

## Sheet: Bradybaena similaris
Supplementary Table 7. Bradybaena similaris core machinery RNAi pathway related genes
gene ID	AA legnth	amino acid sequence	gene name	RNAi pathway
c133302.graph_c0	928	FKILVSGELNQMFPIQPGGYGQTPTGQGMQPSFLGQHLGNGQPGLHFTYPQLQHDVPPPPVTTPIAPPEQTMPPFGQTSVETIVPQTPLADFISPPRPNTGTEGKTISLRANHFQVRVPKGIIHHYEVNISPDKCPRRVNREIIDTMVTAYQQKIFQGQKPVFDGRKNLYSREALPIGMEKVELEVTLPGEGRDRVFKVAIRFVGQVSLFALEEALEGRARQIPMDAIQALDVVMRHLPSKTYTPVGRSFFSPPEGYDHPLGGGREVWFGFHQSVRPSHWKMMLNIDVSATAFYKEQPVIEFMCEVLELPDIGEQKRPLADSQRVKFTKEIKGLKVEITHCGTMRRKYRVCNVTRRPAQTQSFPLQMQSGQTIECTVARYFMERYKMKLQHPHLPCLQV…	Argonaute1	miRNA
c132515.graph_c0	2081	SRTTIFFNNCQMPINDEVDNRDPREIPIQVLSQCLSVLNILGTWCTSSISEYFVMQLEKIVKYEKNDIHKRFLRCVITSLRFLTRVFETNFHPDYDVDELLEYTTPKVRELIRVLRNYKPELDFVIISNDDSYTGDDFSDISDDDSSMSGSDDDESSAGMSHATSKPVHIAVKRTADGGHEHVSSLSEEEERNLCGIVFVENRYIAFGLNKVIEEVCSWDENLCFVKSCHITGQGLQGTNGKQKLNRTFKRQEEALRKFRTQECNLVIATLELEEGVDIPKCNLVVRFDPPHDYRSYTLSKGRARARDASYVILLDQQSCEQFESNLRVFKGIEQVLLGERSYNHASTSKTDREDIDDQDSDDSDNDVDEGHLLPPYCTIPNSPASPQVTIHGAIALIN…	Dicer2	siRNA
c133766.graph_c0	958	KRMSDEPASGRARGRGGRGRGKPQKQKTPGAAQQPAPGHAQPAPHPAQQPAPGPAQPALGHAQPAPGPAQQPAPGPAQRPAPGPAQQQAVQPAREGAGPGPAVGRGRTRGPQRPQQVEQIAAPATVVQMPPAEPPVASGRGVHRGGGRERPRGDGDAPVEEMARLGLETTHRRRQPFEKYIEVPYKDEGKNSHGTHGQVIELYTNYFKVTLPSEFKIWQYHVNFNPEVESVRVKFALIANLELVTGAVKCFDGGILYLCRLLPNEVTECFATRSYDNAVIRIELKRVAEVFANTPQYIQIVNLLFKKVLLAMGMKLIRDHYFNPALTVKIHKHKLEVMPGFATSILRYEAGNLLGVDIVHKILRIDTFLDCLYNLYYSFQQEDLKVFHAAAIKNFVGTI…	Aubergine	piRNA
c110261.graph_c0	589	TVHDIMERALNTNGAGRRGEISRKVVGCTVLTRYNNKTYTVNDIVWDKSPMDRFECKSTGESMSFEEYYRKQYNITIHNRTQPLLLNKRKPPRGAPPGTKPDPEFLCLIPELCYMTGLTEDIRKNFTVMKDLAIHTRVTPAQRQYAMKKFINNVNSTPEARAELAMWGLHLDTTTVSIAGRQLPQEMISMGRGGKKFPAGPQADWSREITRNELICPVNLLNWGLFYTRKDAGRANDFARVMLSETRNLGISCQAPFRRELVNEKIDTLVEELRRSINDQVQLVVVINPTNRDDRYSAIKKLCCVERPVPSQVIISKTISRPDKMRSVVQKIALQINCKLGGELWSVHIPLQKLMVVGIDTYHDSAKSRQSIGGFVASMNQDCTRWYSRVCFQRPGQEL…	Aubergine	piRNA
